# Supplementary material for: Anti-Mycobacterial N-(2-Arylethyl)quinolin-3-amines Inspired by Marine Sponge-Derived Alkaloid
Source: MDPI journal article supplement (doi:10.3390/molecules27248701), 2022-12-08

*Supplementary Materials*

# Anti-mycobacterial *N*-(2-Arylethyl)quinolin-3-amines Inspired by Marine Sponge-Derived Alkaloid

Junya Mukomura <sup>1</sup>, Hiroki Nonaka <sup>2</sup>, Hiromasa Sato <sup>2</sup>, Maho Kishimoto <sup>1</sup>, Masayoshi Arai <sup>2</sup>  
and Naoyuki Kotoku <sup>1,2,\*</sup>

<sup>1</sup> College of Pharmaceutical Sciences, Ritsumeikan University, 1-1-1 Noji-Higashi, Kusatsu, Shiga 525-8577, Japan; ph0107ir@ed.ritsumei.ac.jp (J.M.); ph0077hr@ed.ritsumei.ac.jp (M.K.)

<sup>2</sup> Graduate School of Pharmaceutical Sciences, Osaka University, 1-6 Yamadaoka, Suita, Osaka 565-0871, Japan; hiroki.olympique.lyonnais@gmail.com (H.N.); sato0704hiromasa@gmail.com (H.S.); araim@phs.osaka-u.ac.jp (M.A.)

\* Correspondence: kotoku@fc.ritsumei.ac.jp; Tel.: +81-77-561-4920

## Contents

<sup>1</sup>H- and <sup>13</sup>C-NMR spectra for new compounds: pages S2-S21.

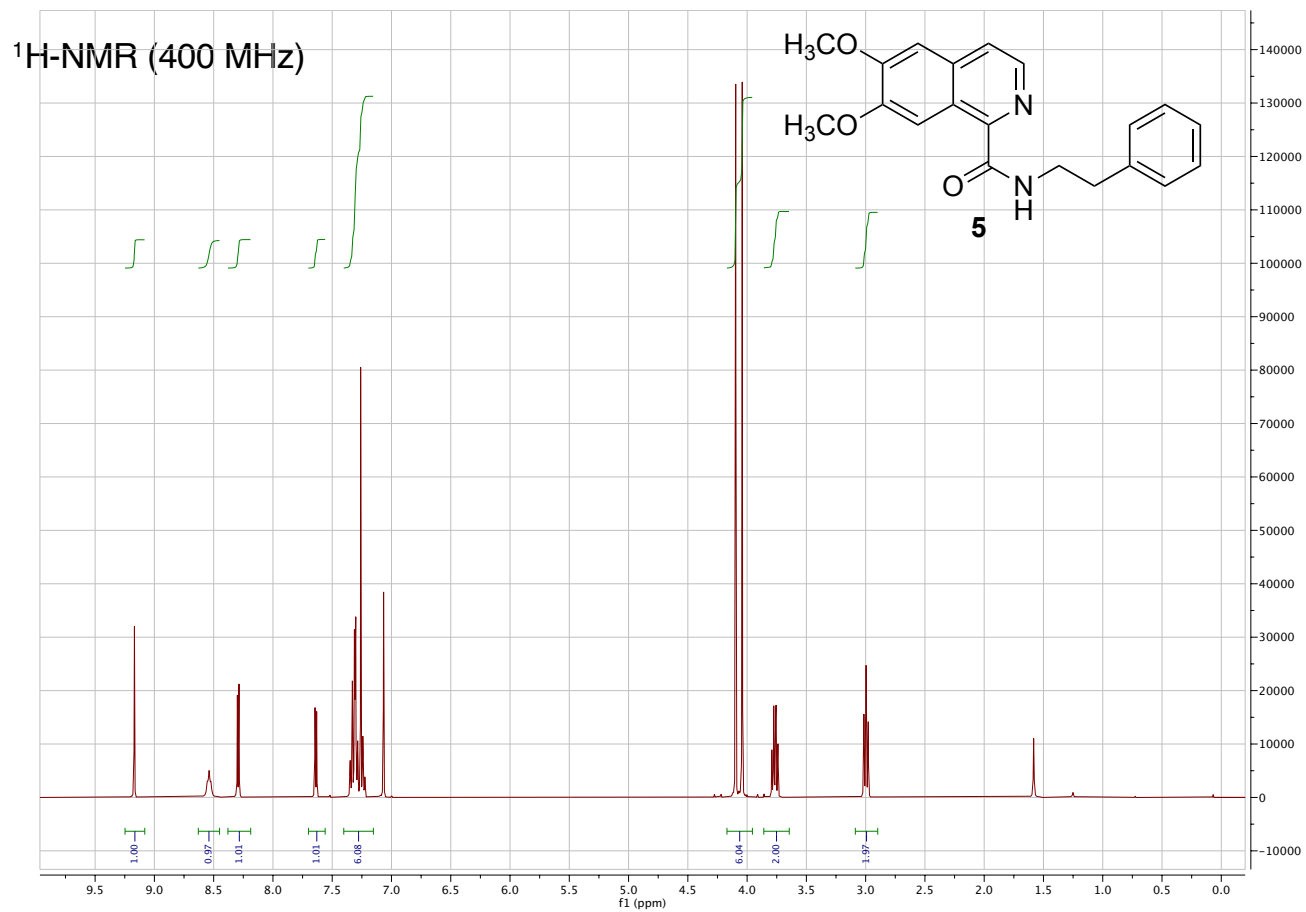

<sup>13</sup>C-NMR (150 MHz)

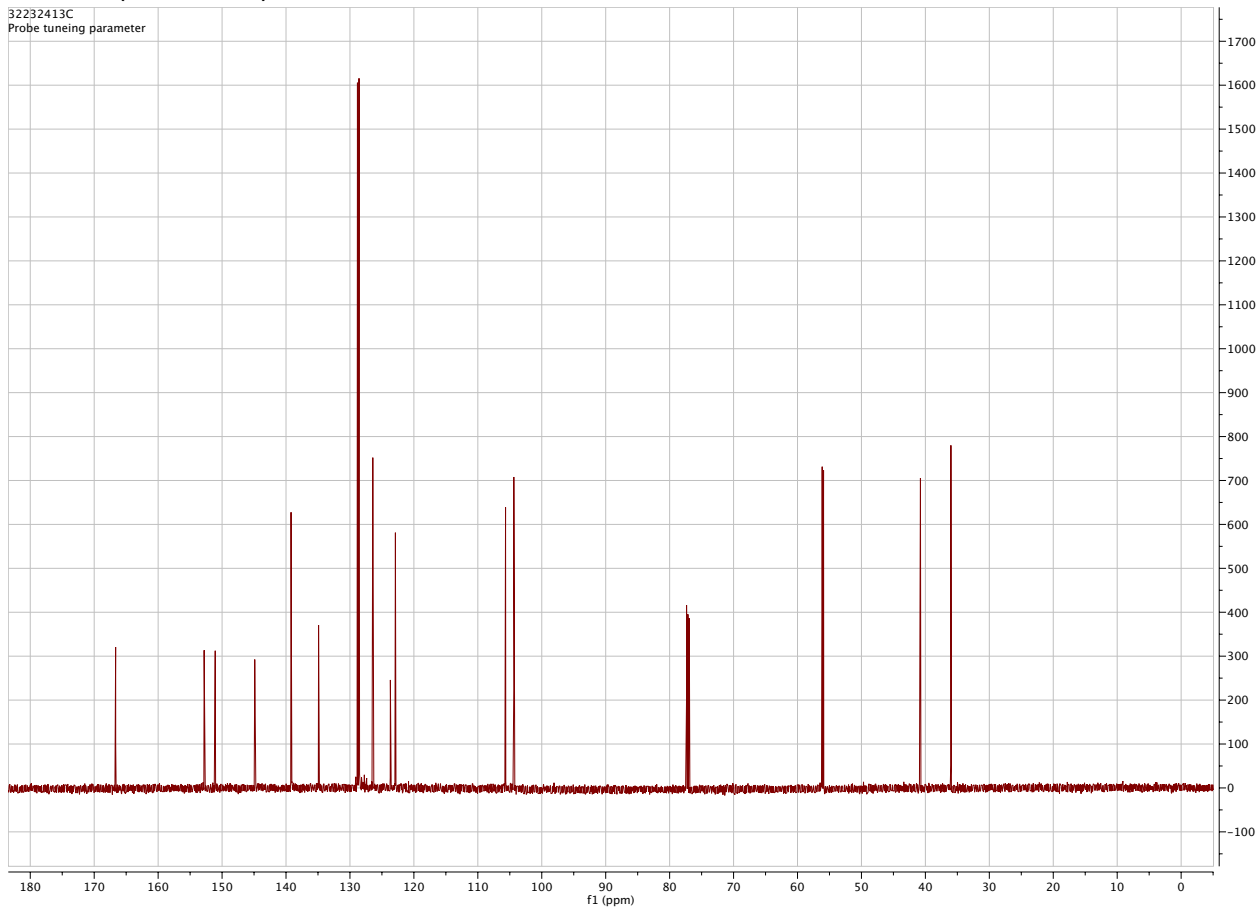

<sup>1</sup>H-NMR (500 MHz)

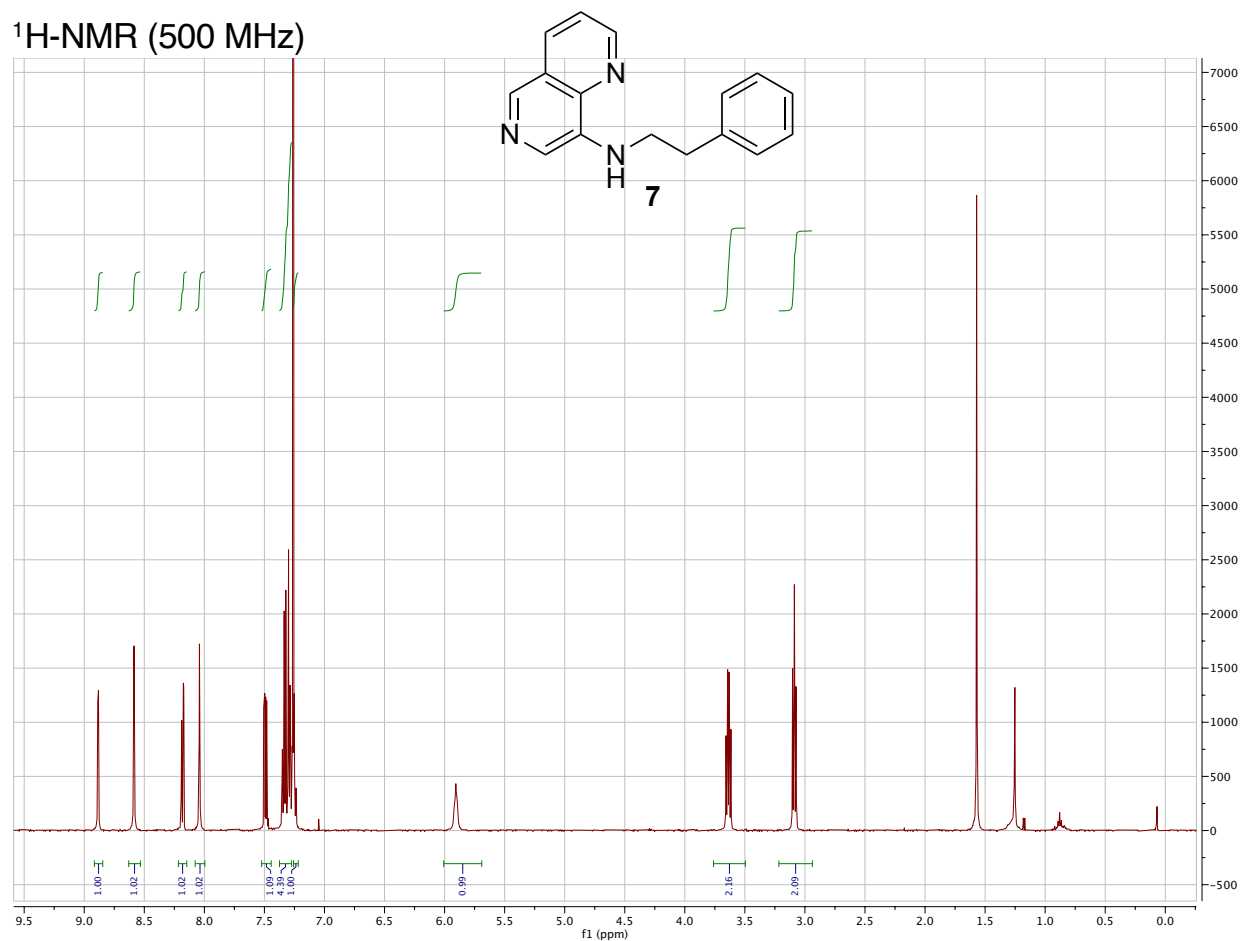

<sup>13</sup>C-NMR (150 MHz)

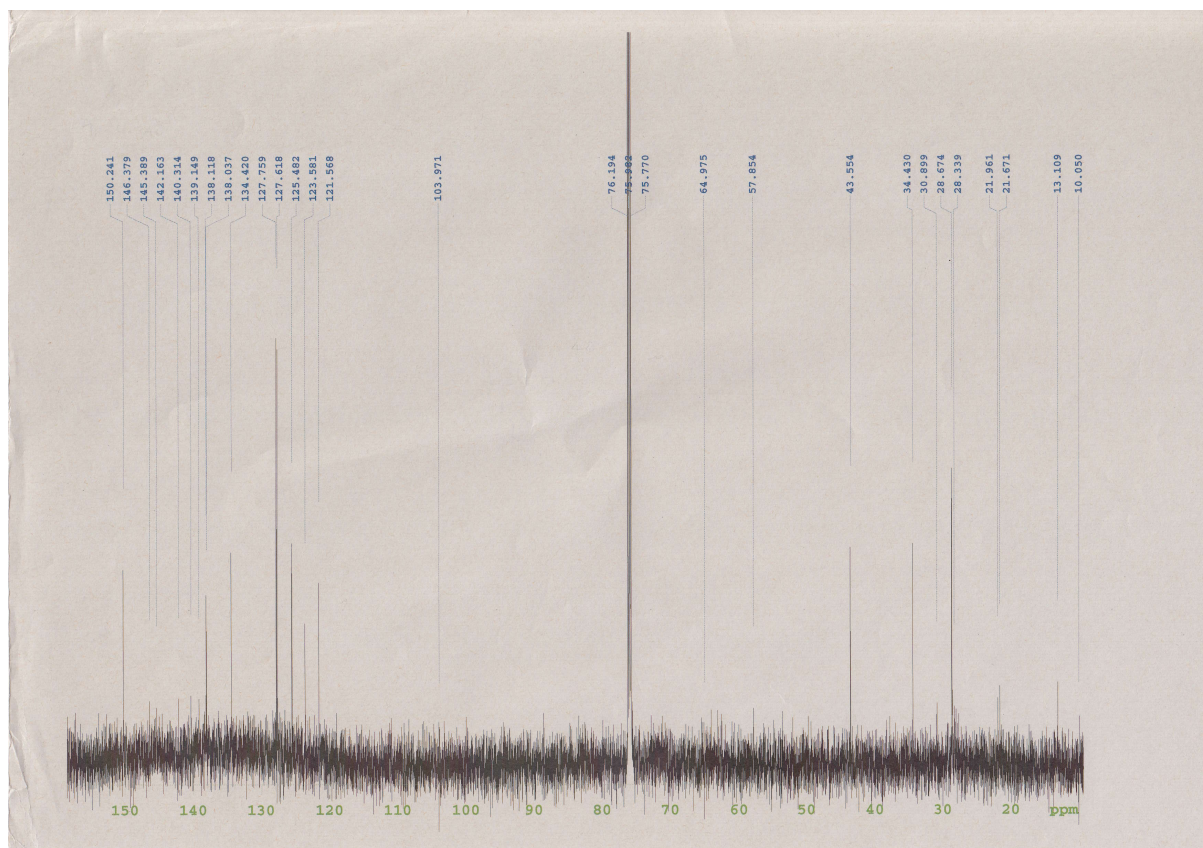

<sup>1</sup>H-NMR (400 MHz)

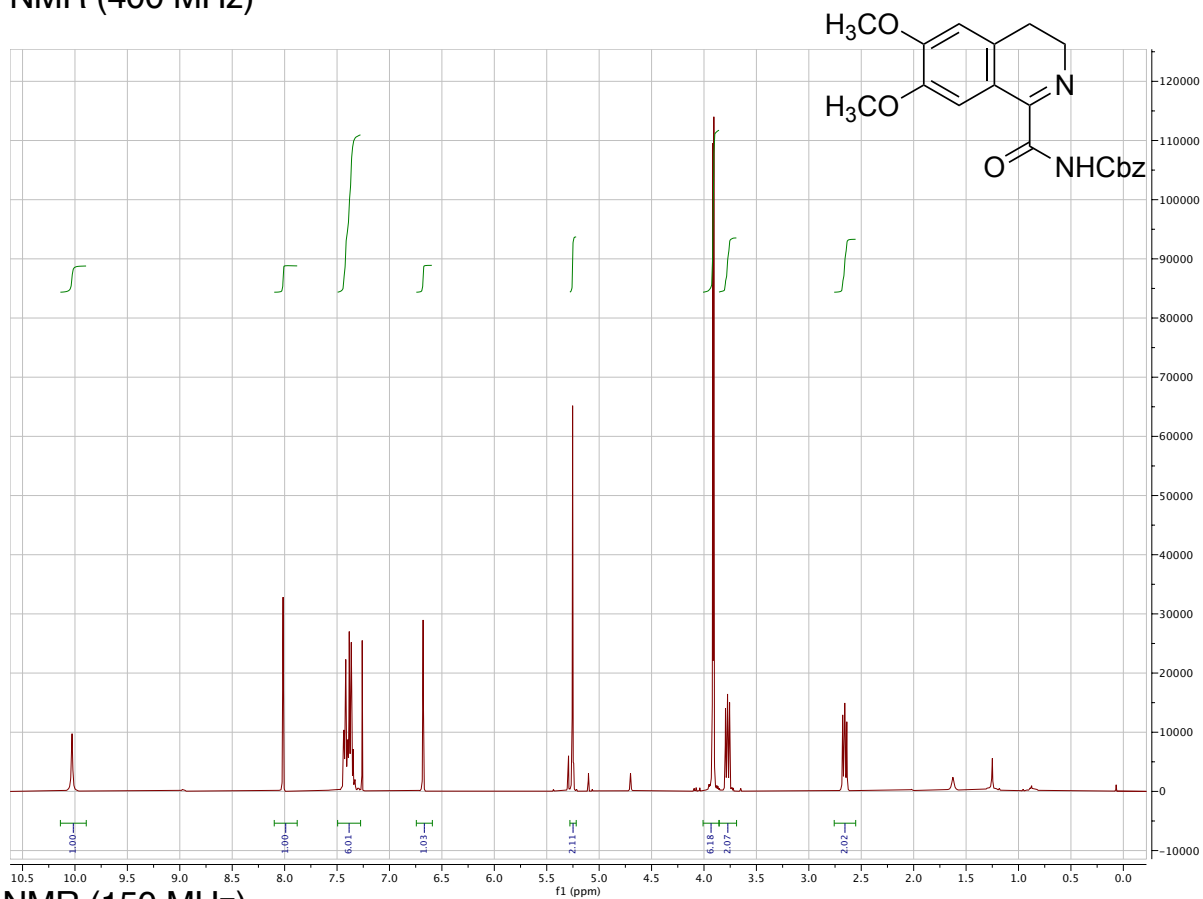

<sup>13</sup>C-NMR (150 MHz)

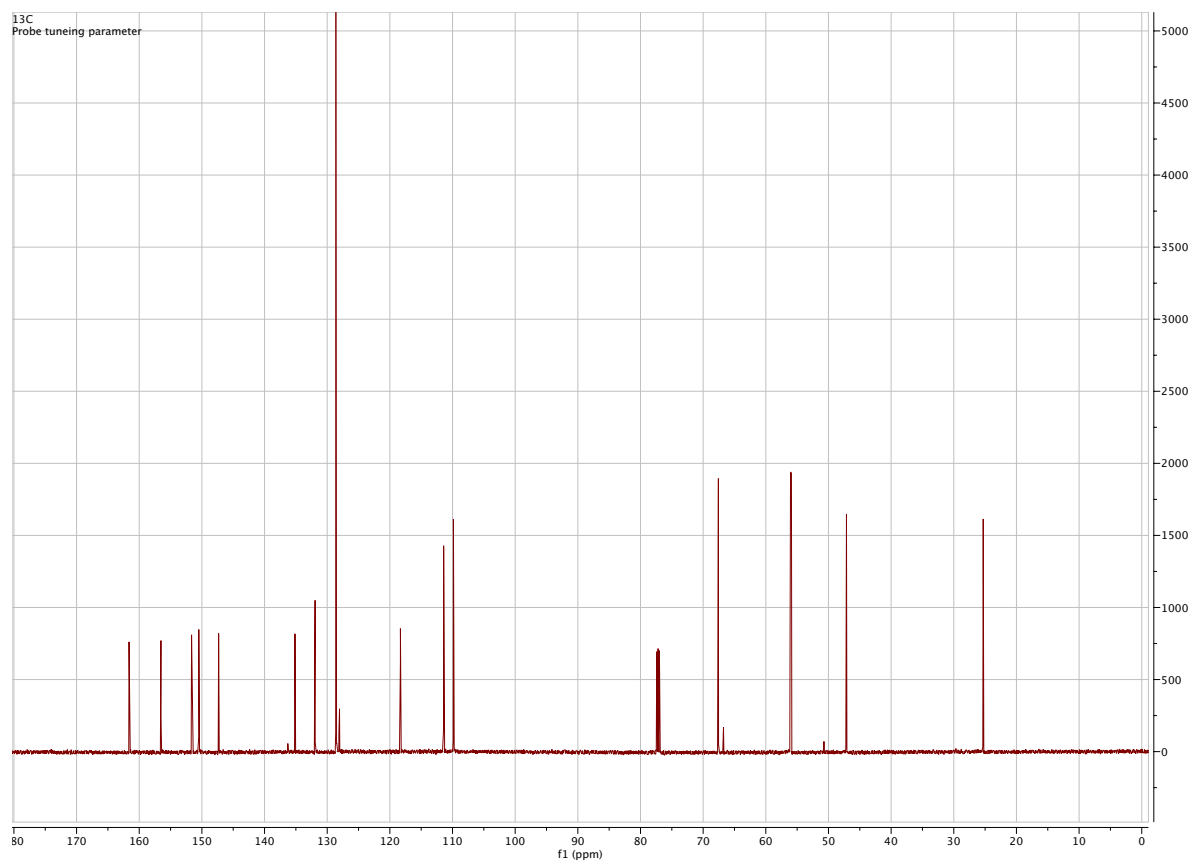

# <sup>1</sup>H-NMR (300 MHz)

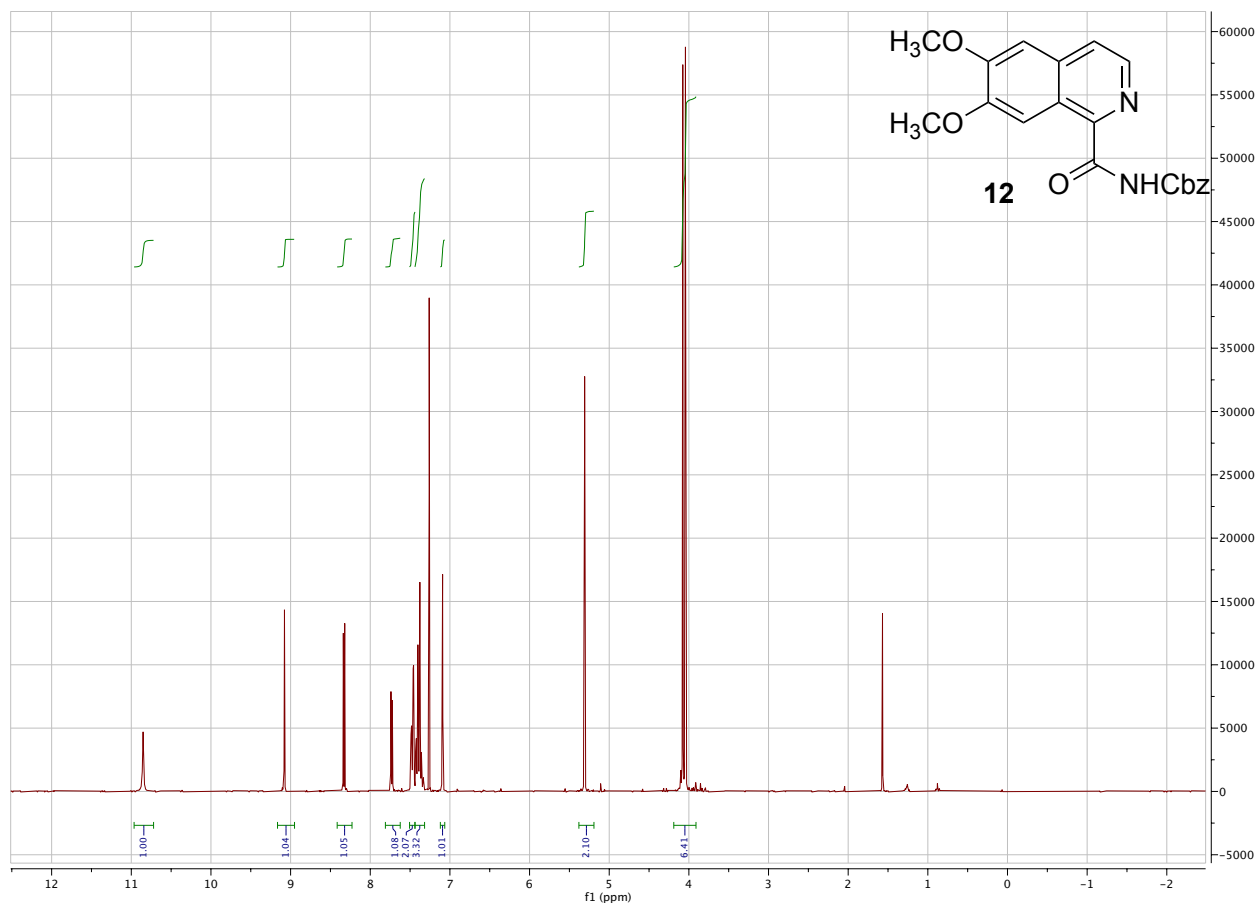

# <sup>13</sup>C-NMR (150 MHz)

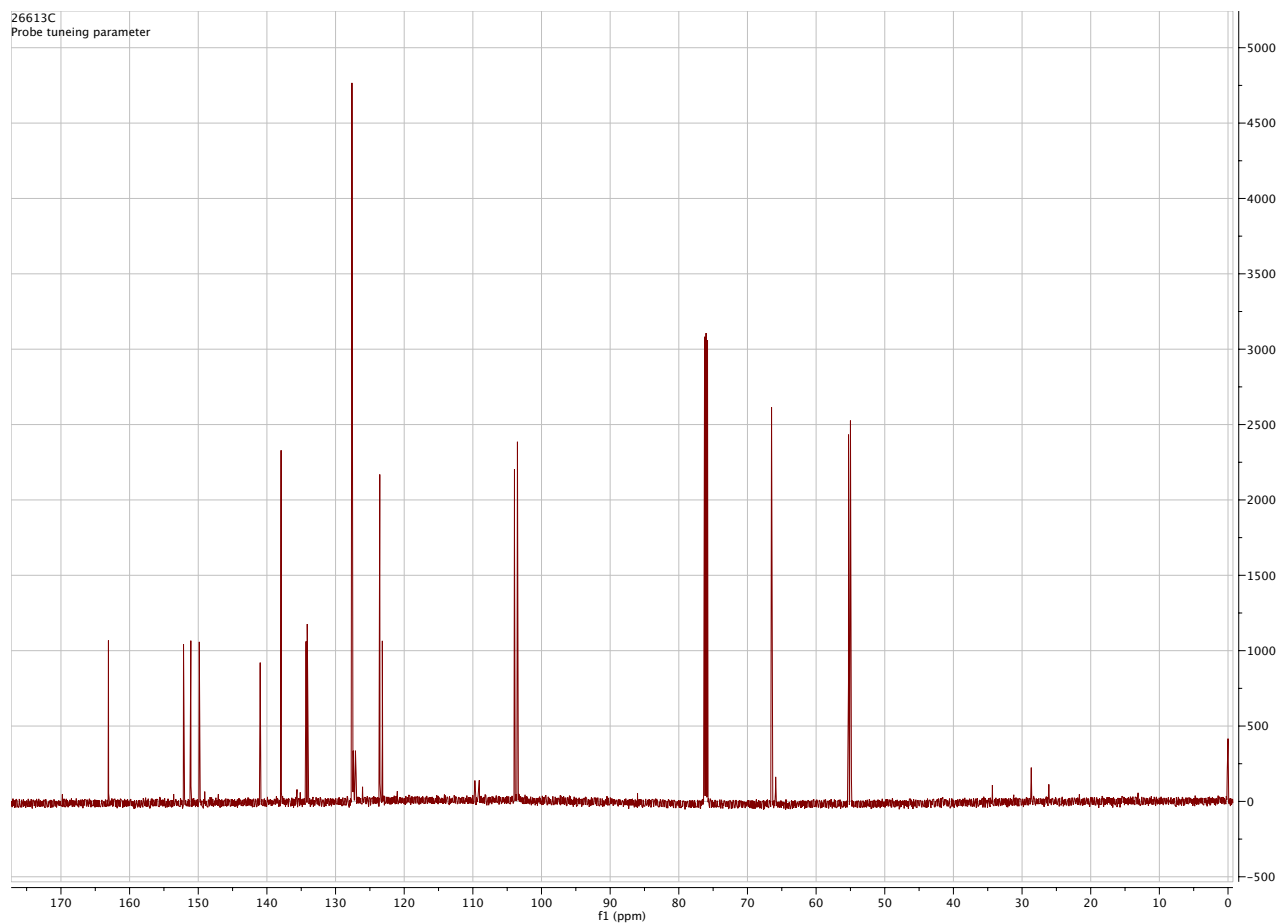

# <sup>1</sup>H-NMR (500 MHz)

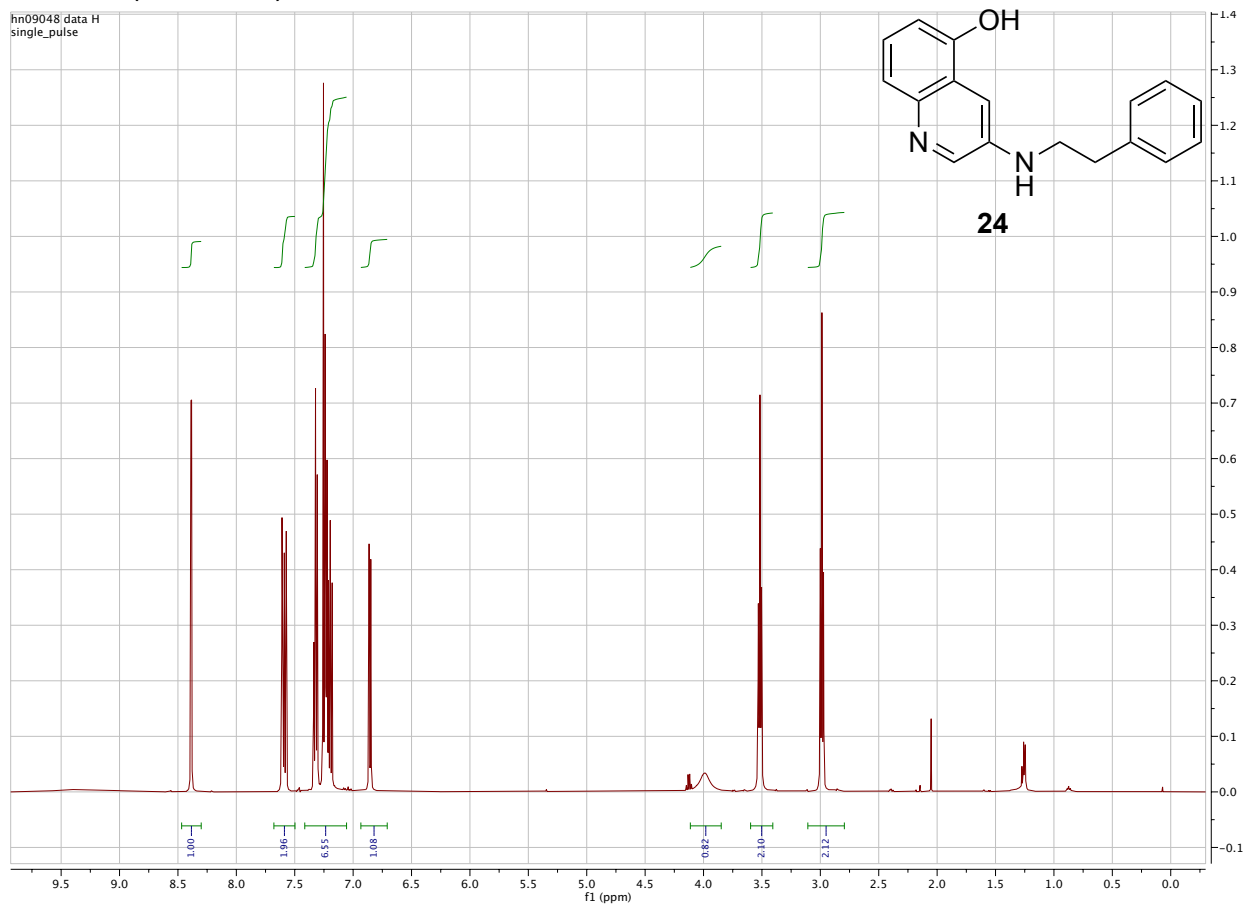

# <sup>13</sup>C-NMR (125 MHz)

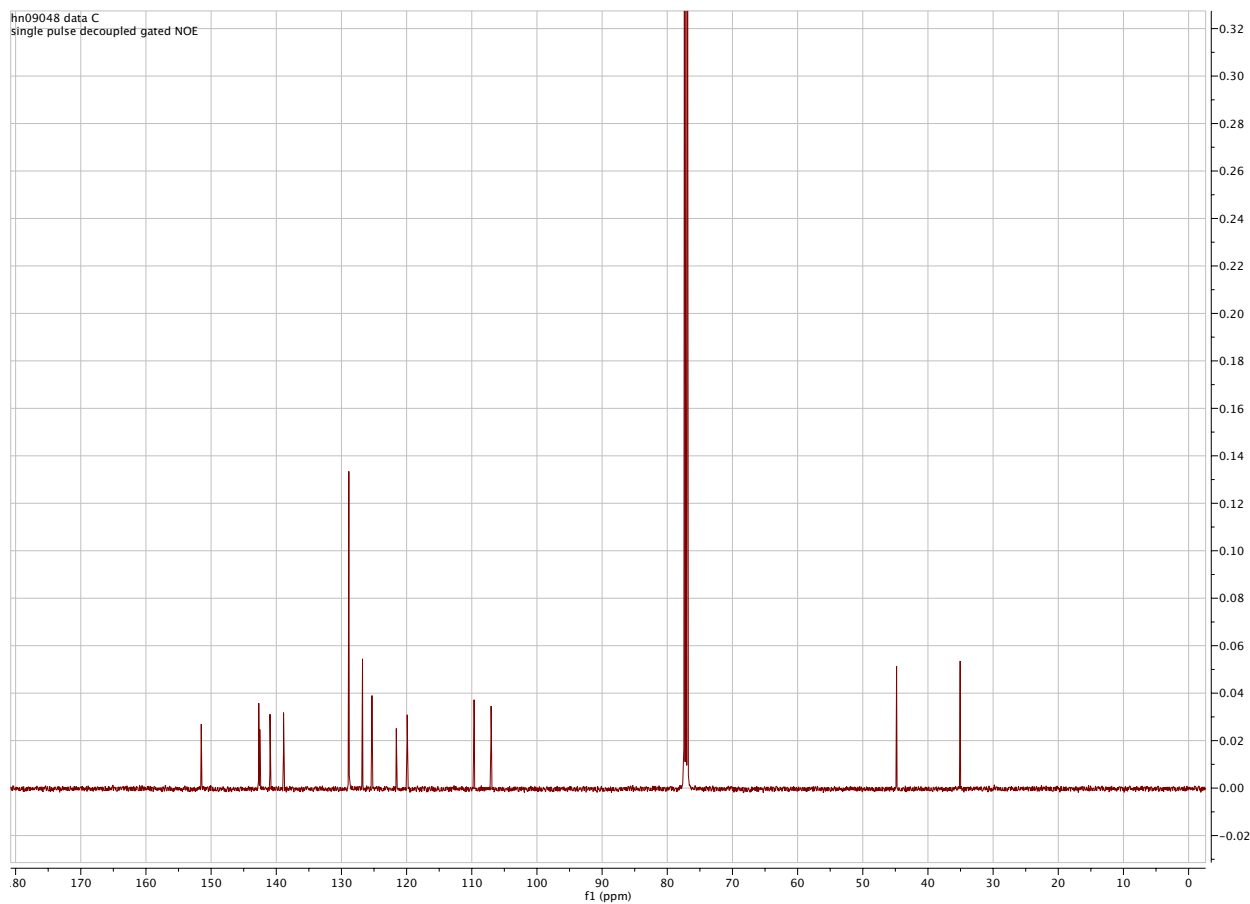

# <sup>1</sup>H-NMR (600 MHz)

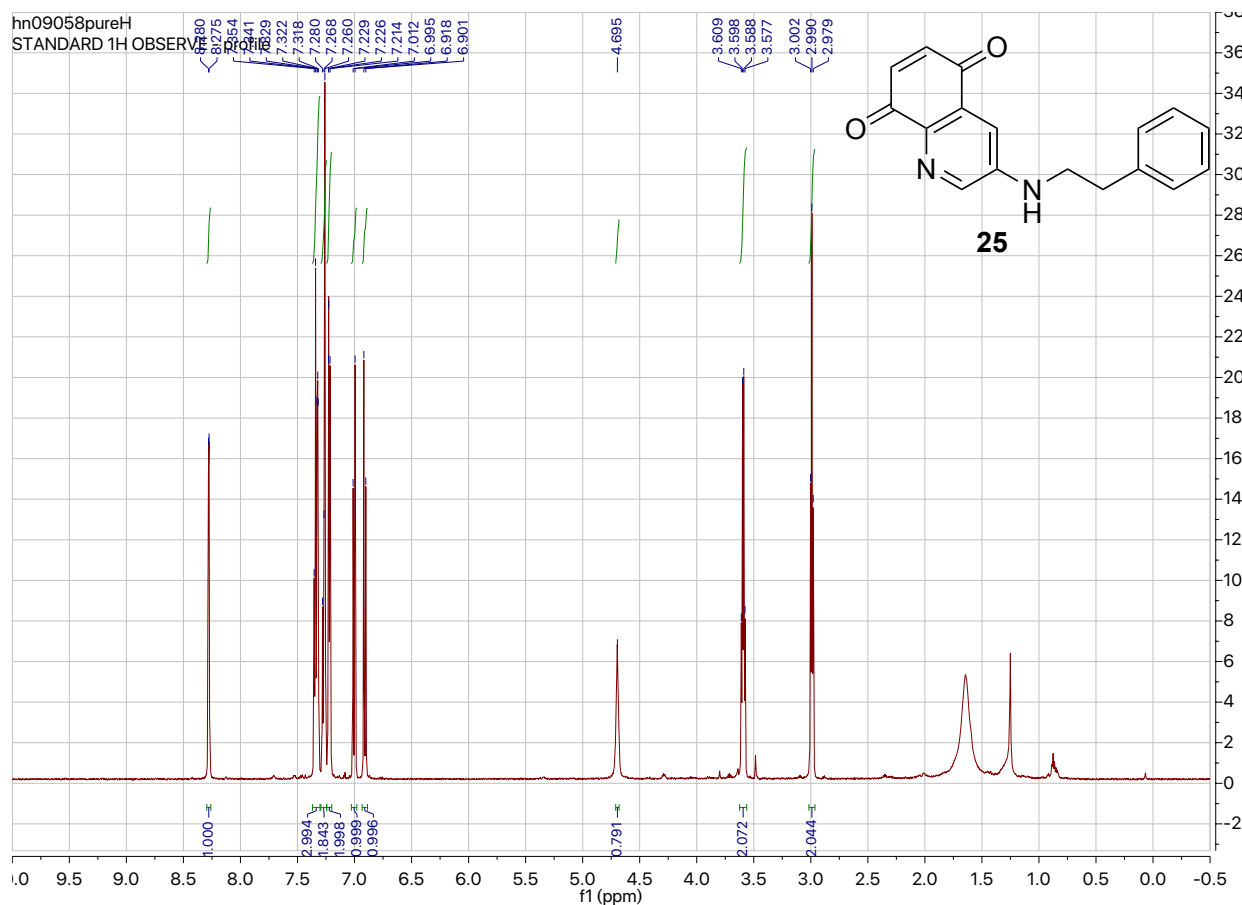

# <sup>13</sup>C-NMR (150 MHz)

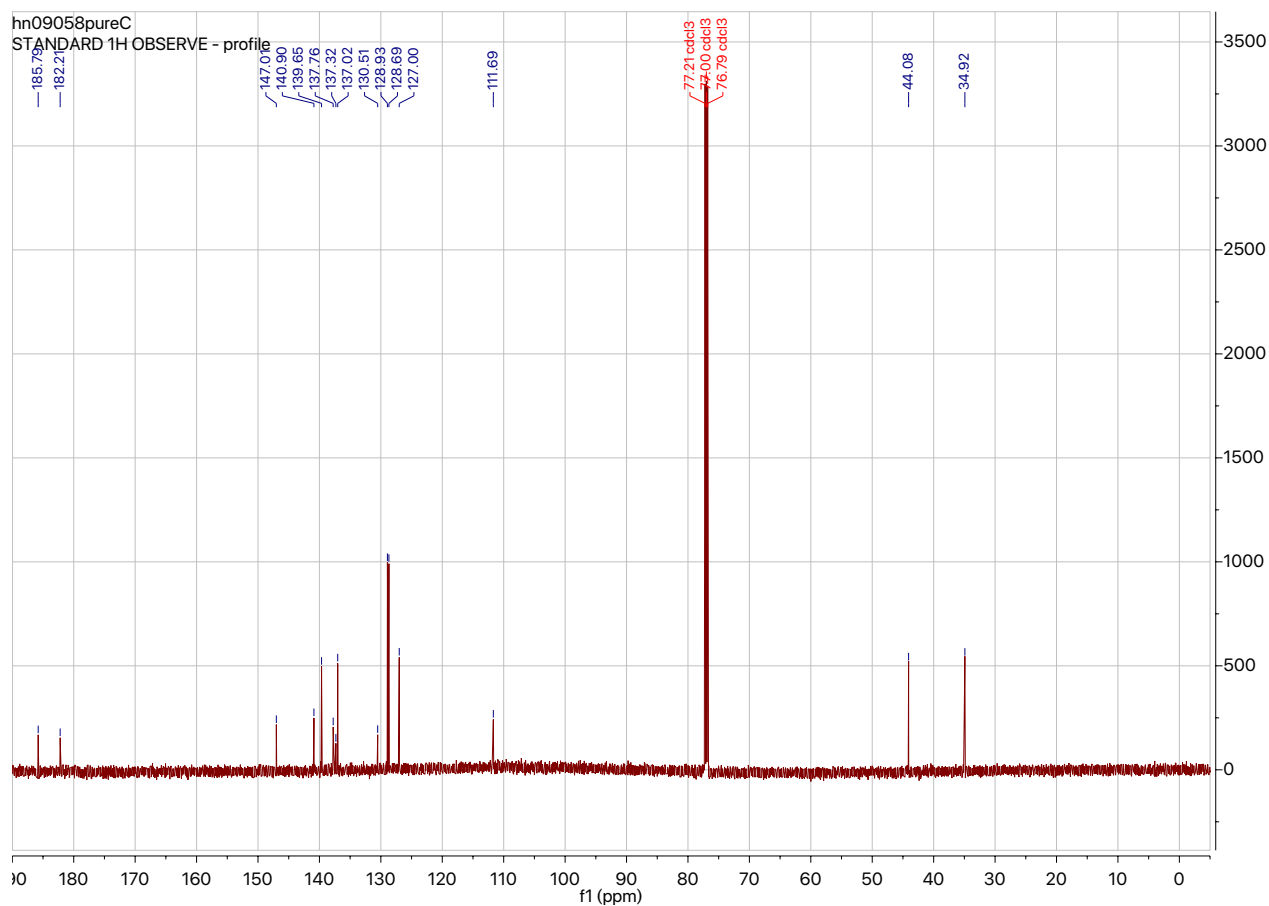

<sup>1</sup>H-NMR (300 MHz)

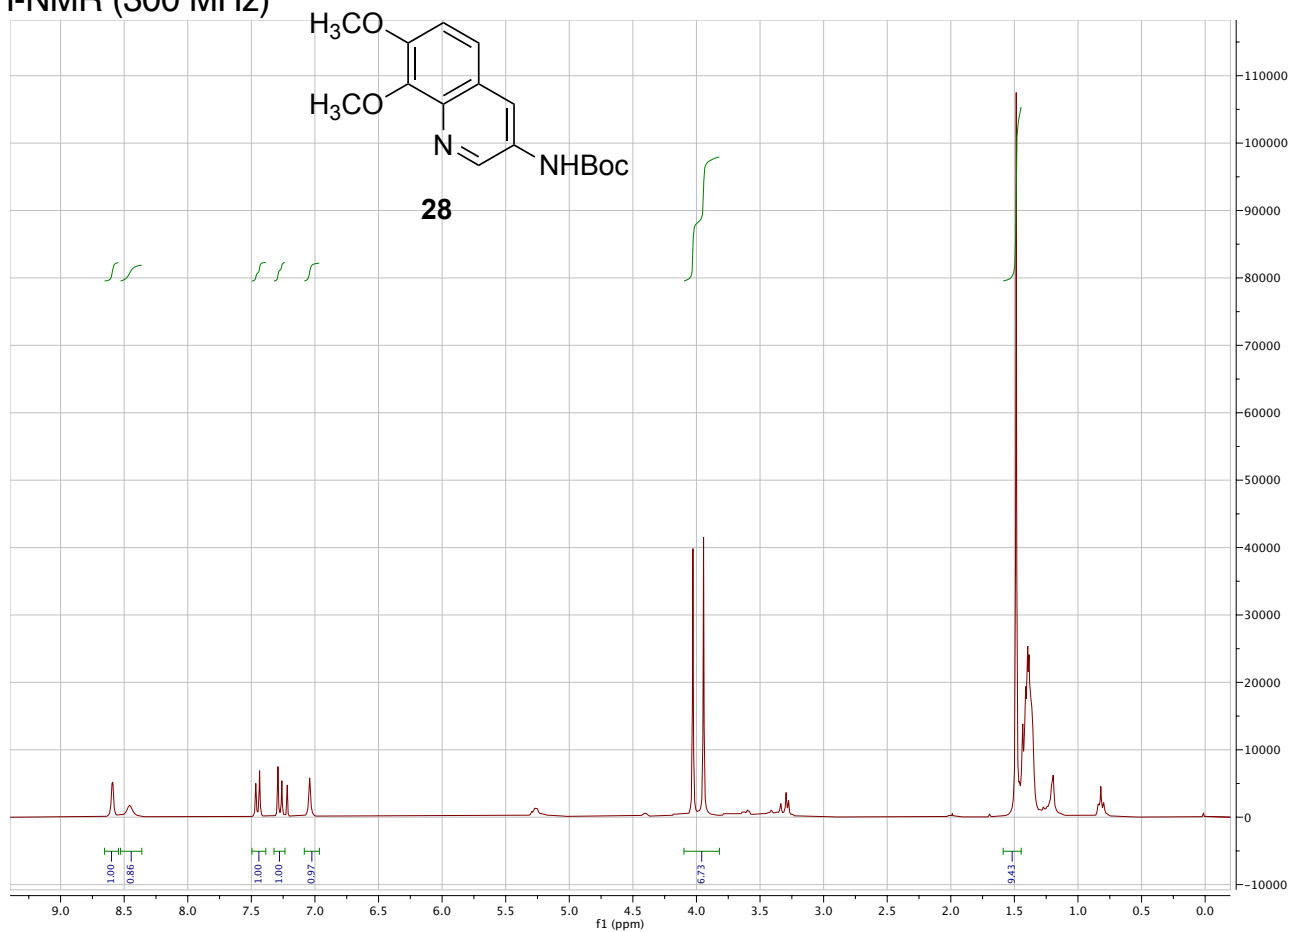

<sup>1</sup>H-NMR (500 MHz)

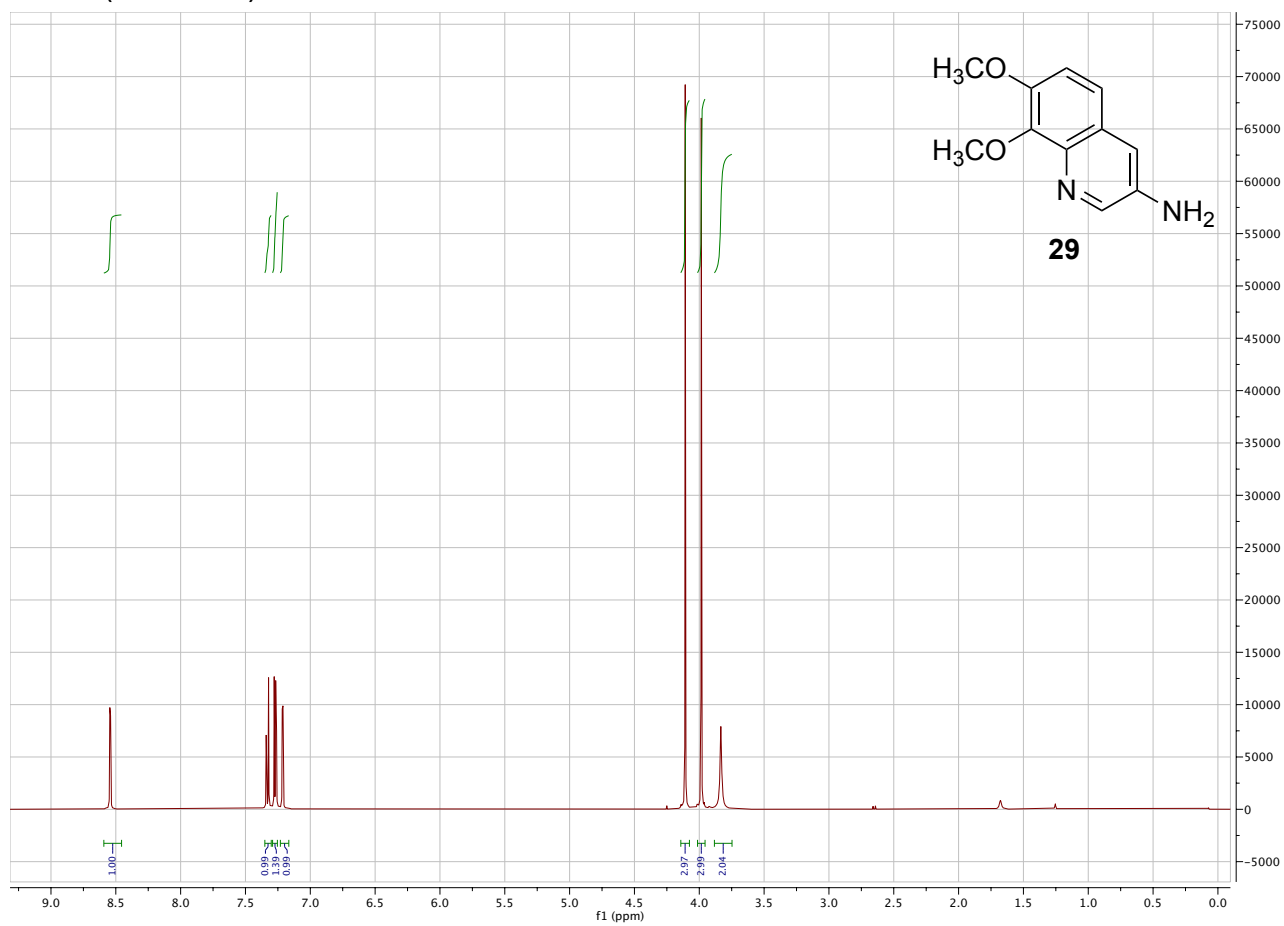



# <sup>1</sup>H-NMR (500 MHz)

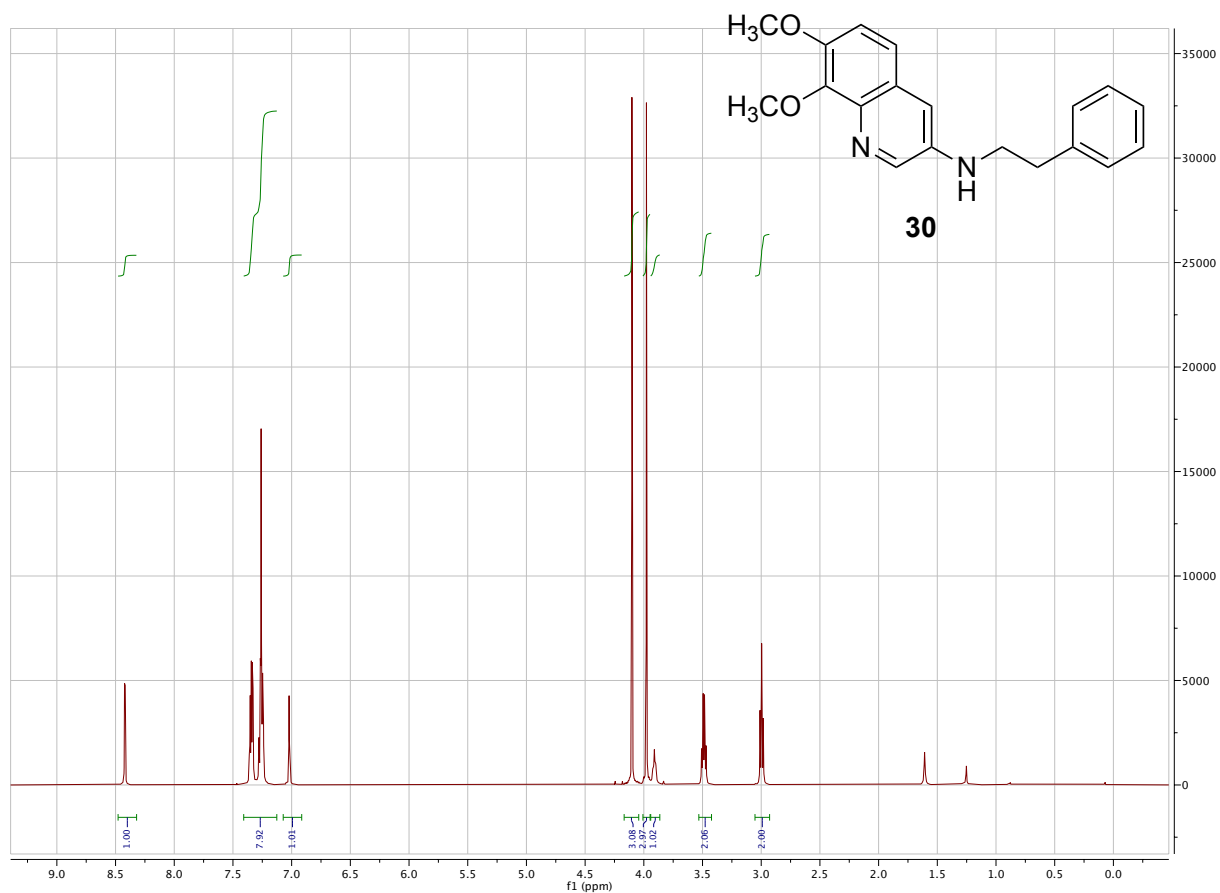

# <sup>13</sup>C-NMR (150 MHz)

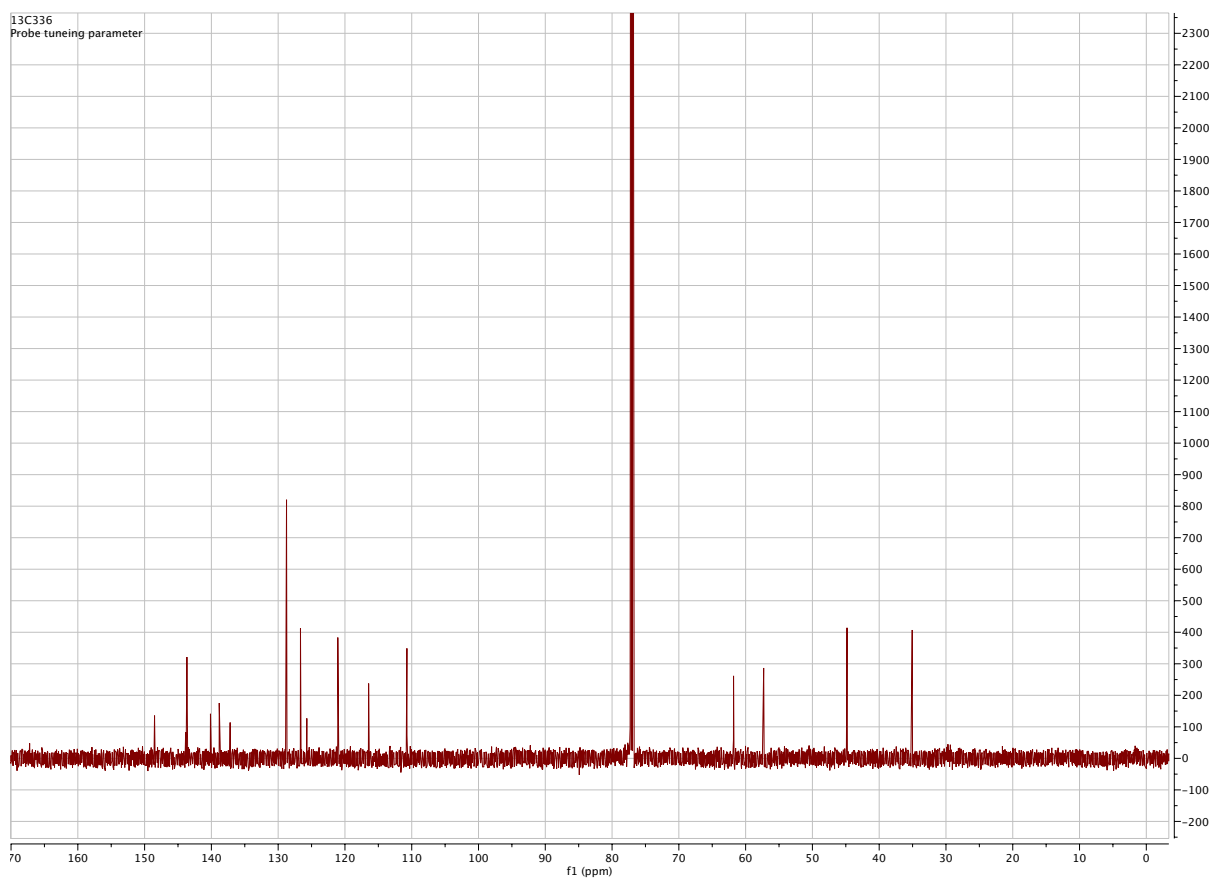

# <sup>1</sup>H-NMR (500 MHz)

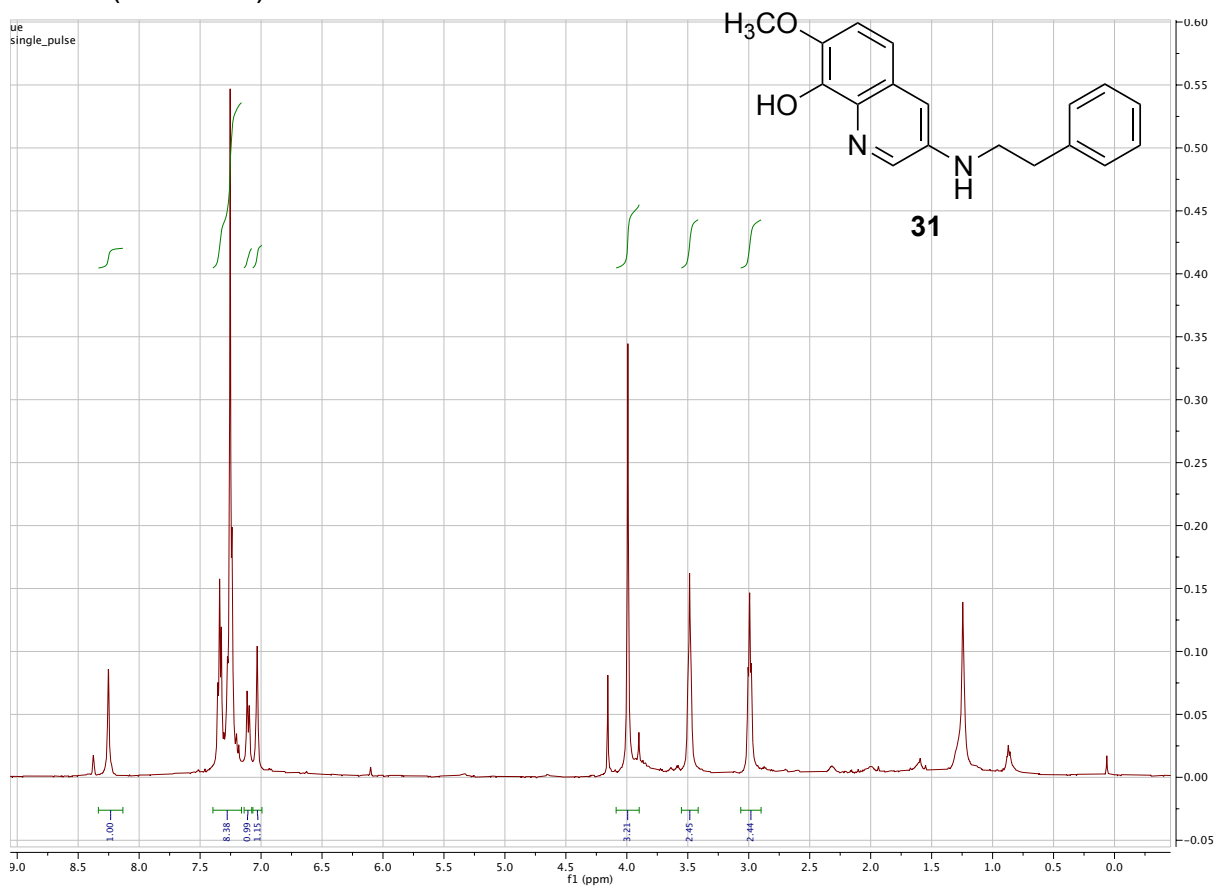

# <sup>13</sup>C-NMR (125 MHz)

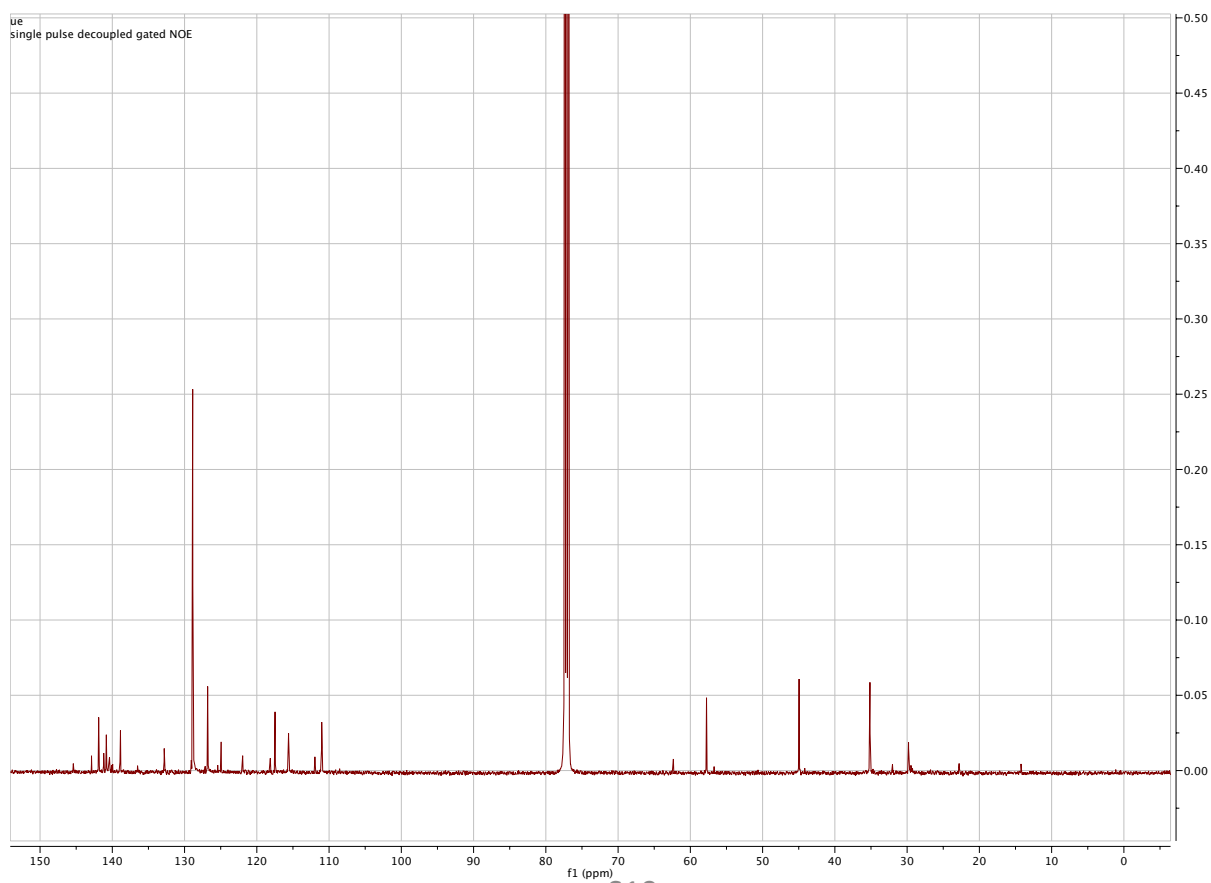

# <sup>1</sup>H-NMR (600 MHz)

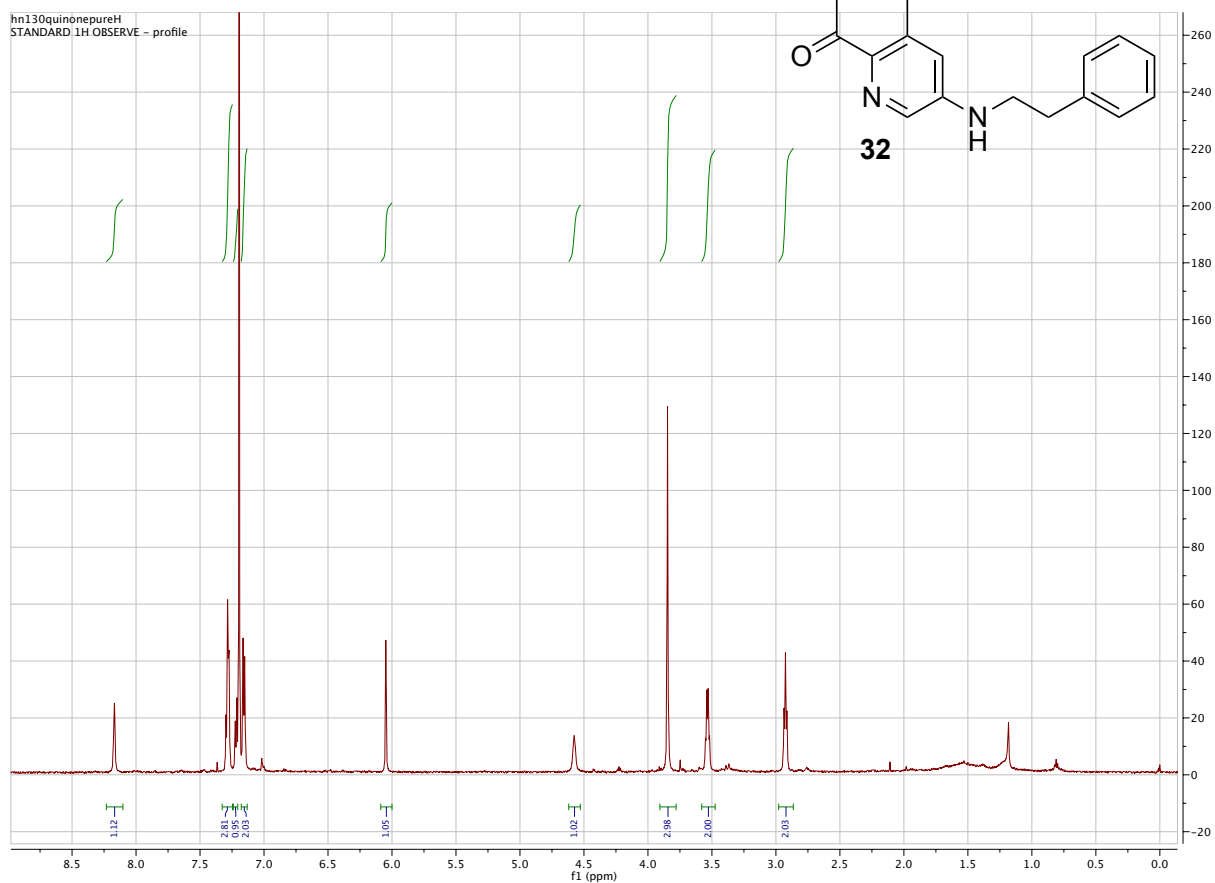

# <sup>13</sup>C-NMR (150 MHz)

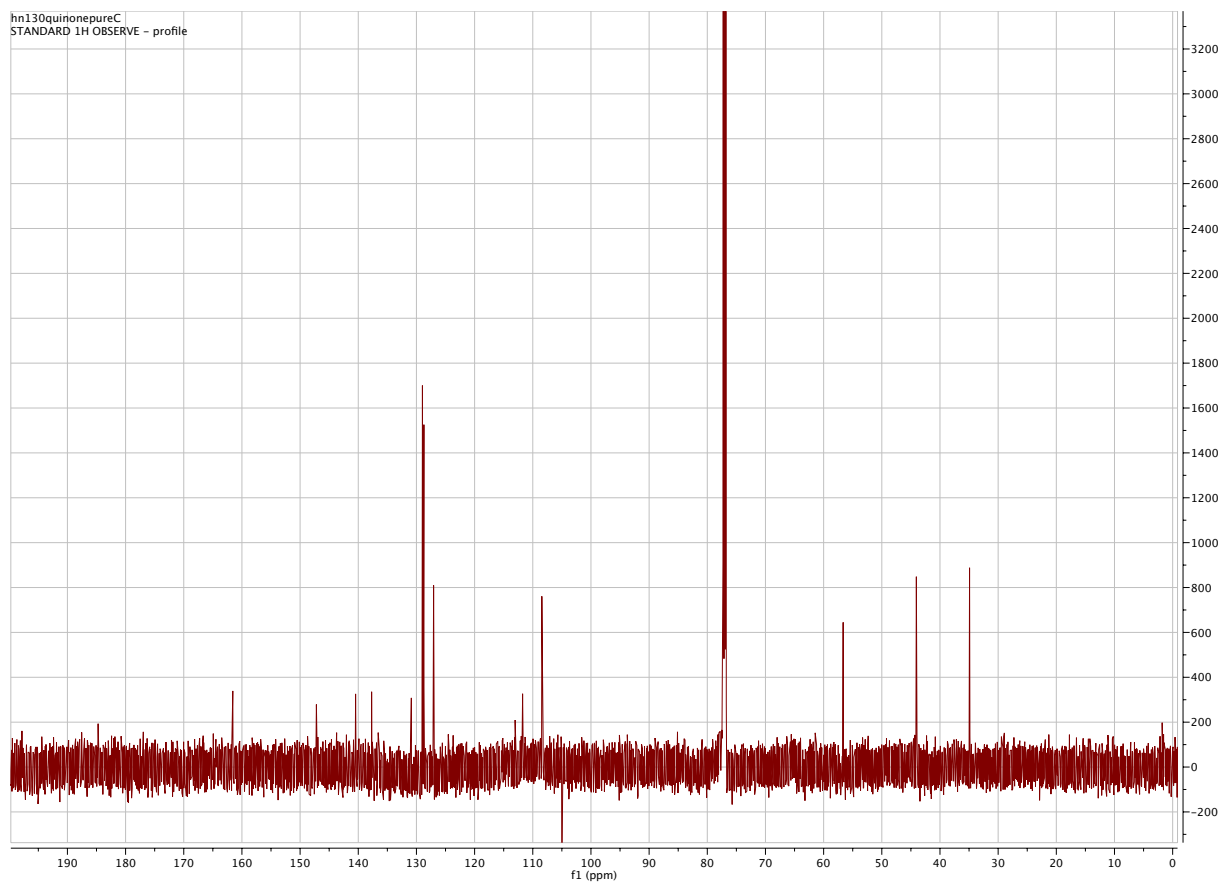

# <sup>1</sup>H-NMR (600 MHz)

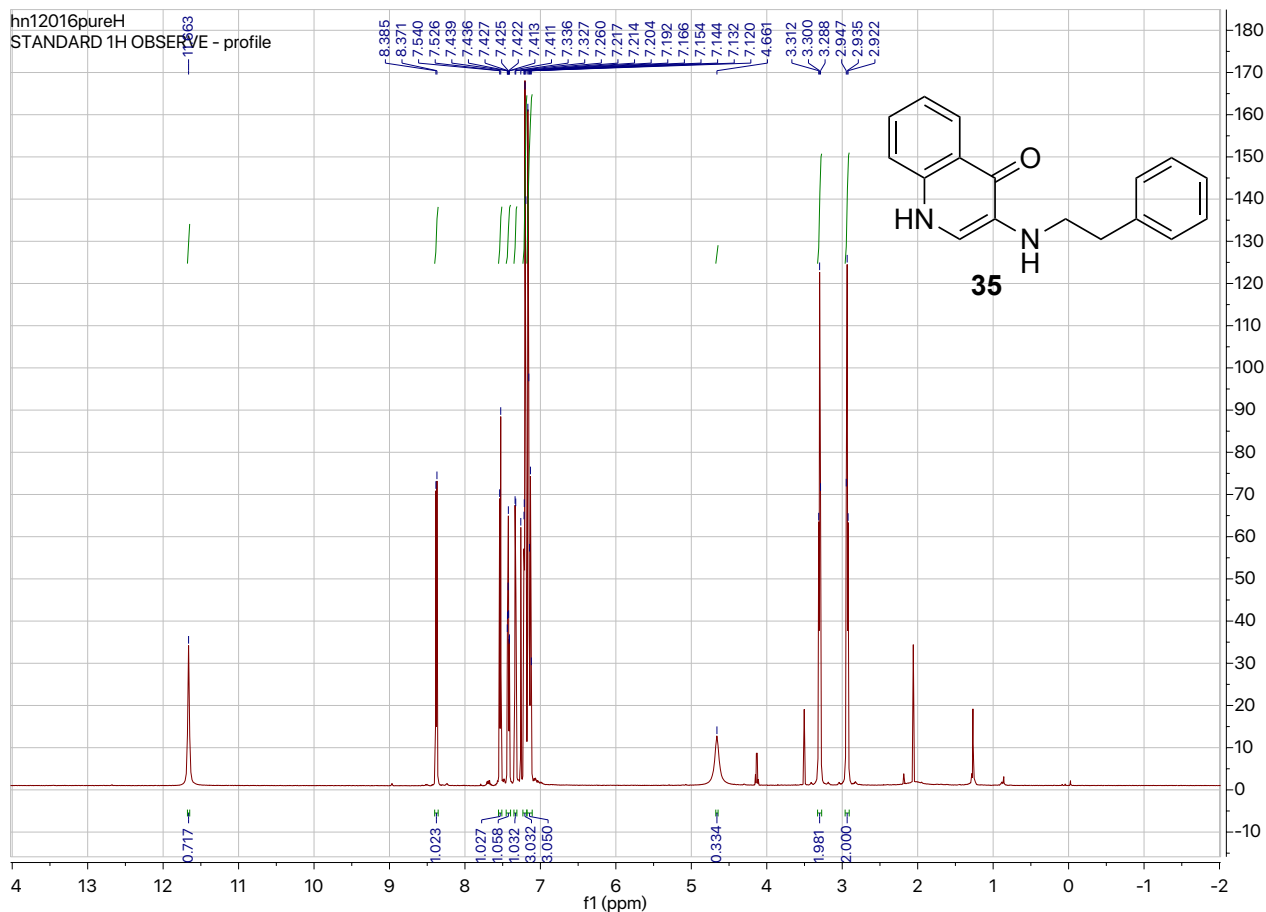

# <sup>13</sup>C-NMR (150 MHz)

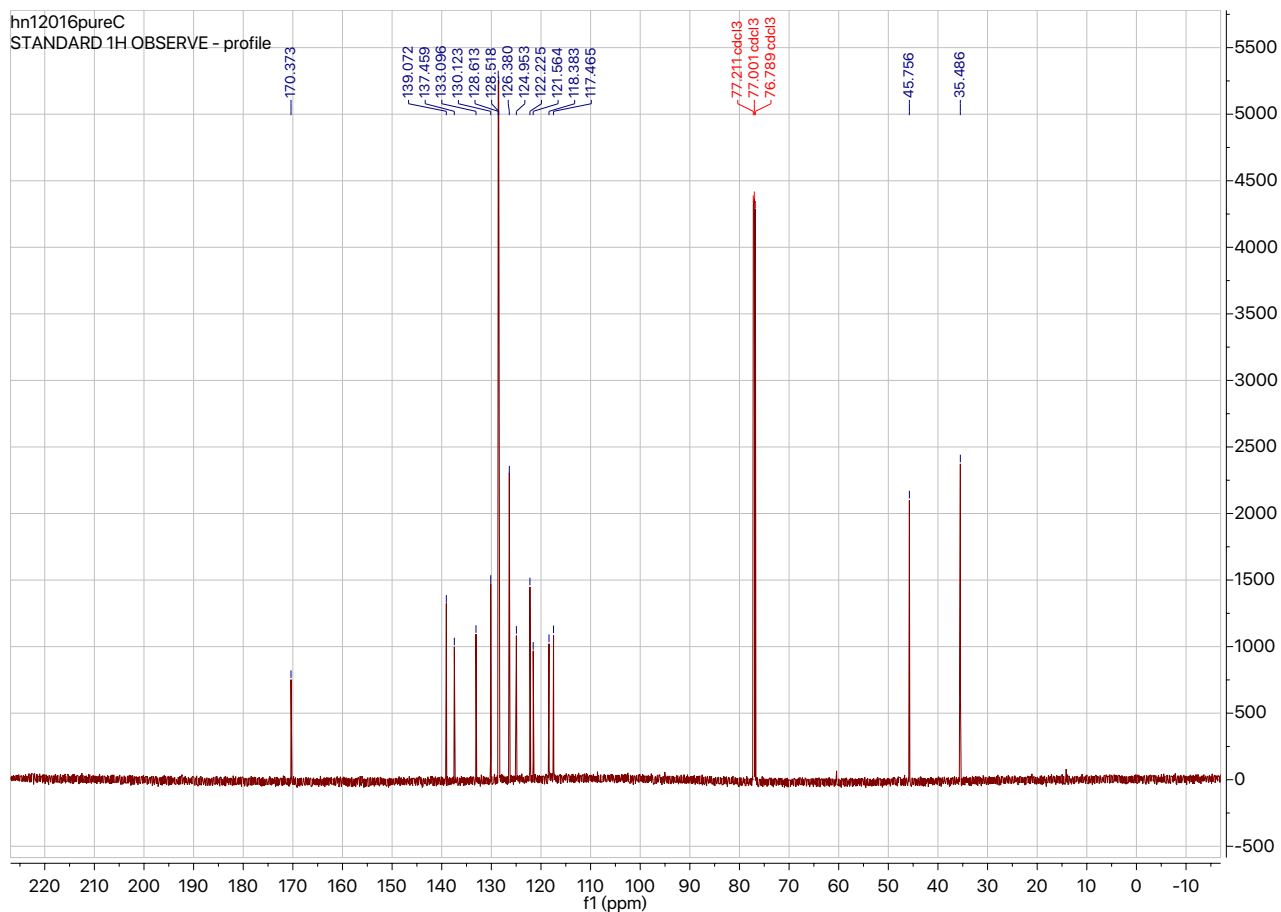

# <sup>1</sup>H-NMR (600 MHz)

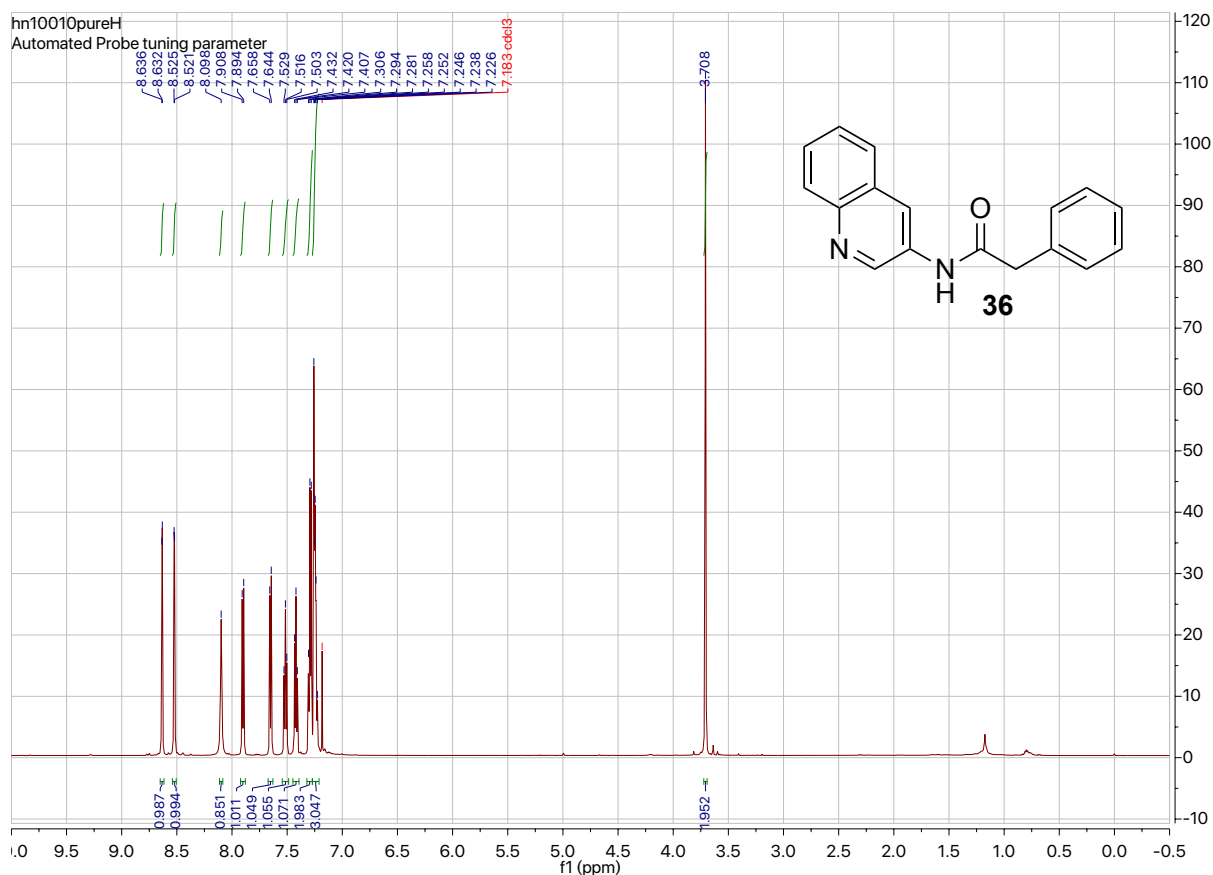

# <sup>13</sup>C-NMR (150 MHz)

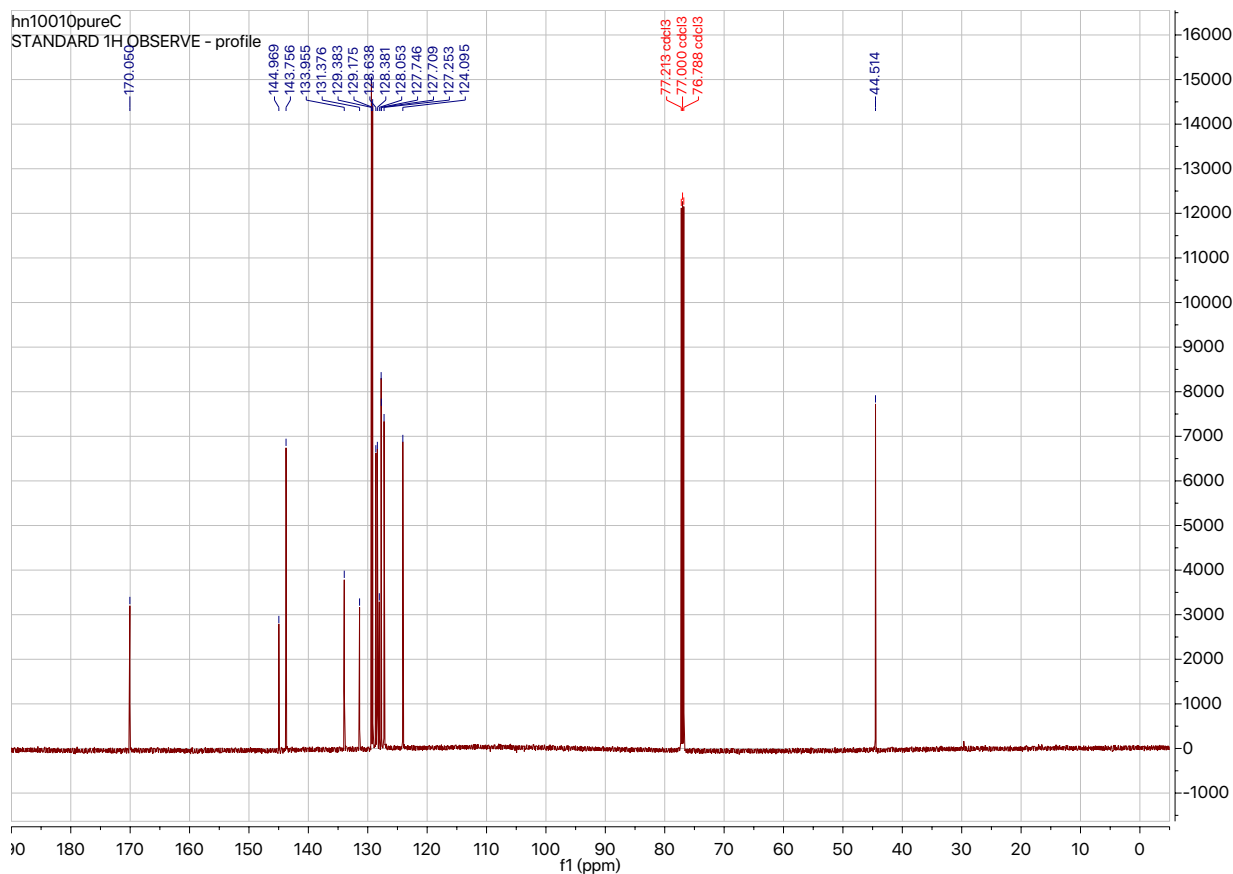

# <sup>1</sup>H-NMR (600 MHz)

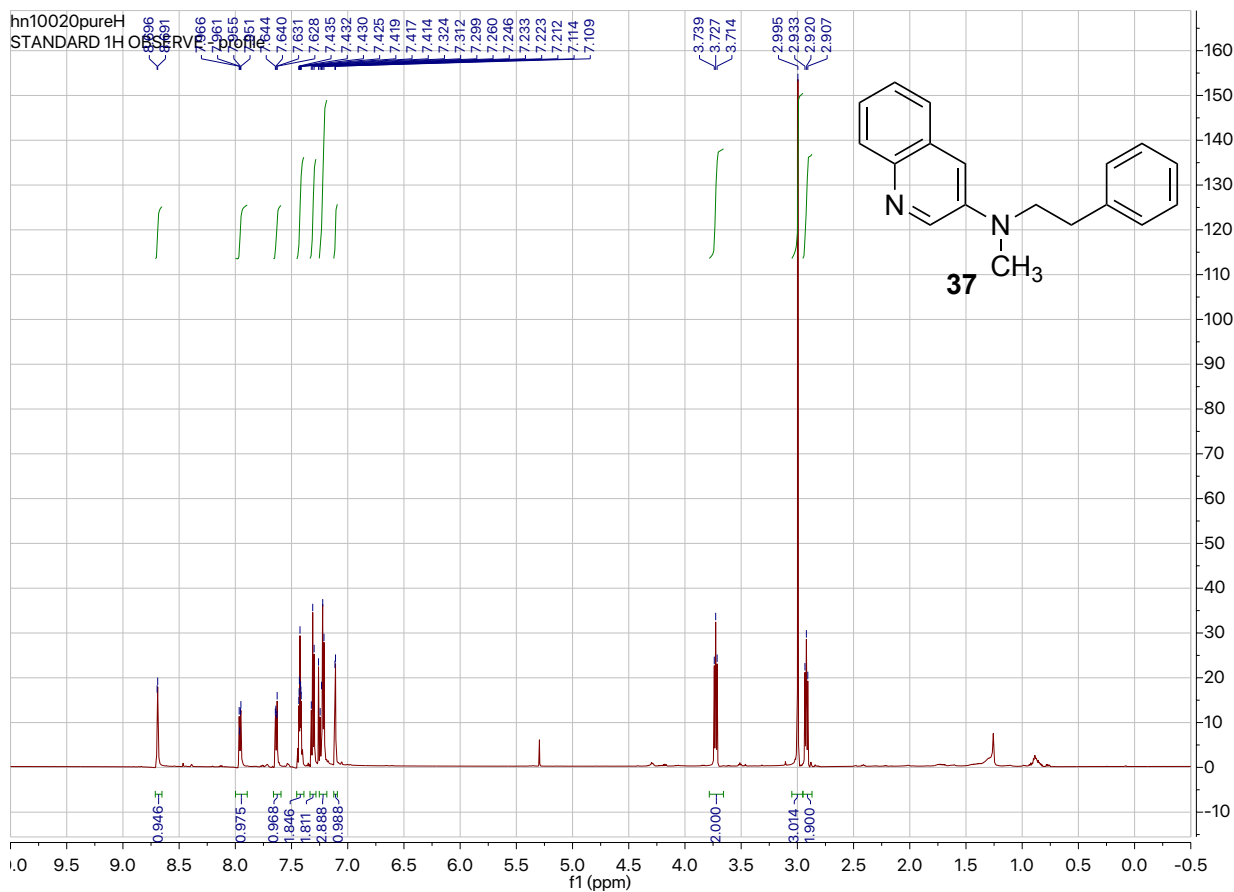

# <sup>13</sup>C-NMR (150 MHz)

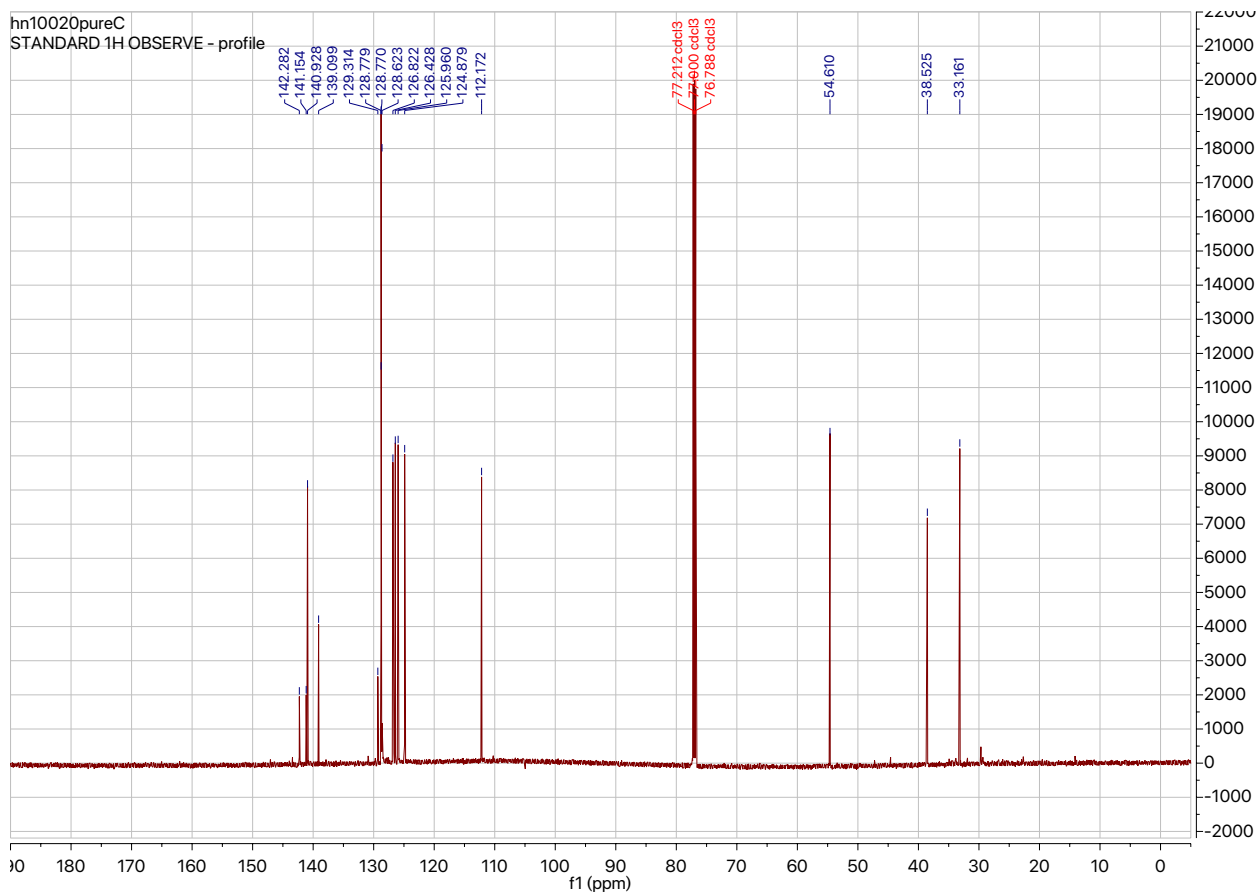

# <sup>1</sup>H-NMR (500 MHz)

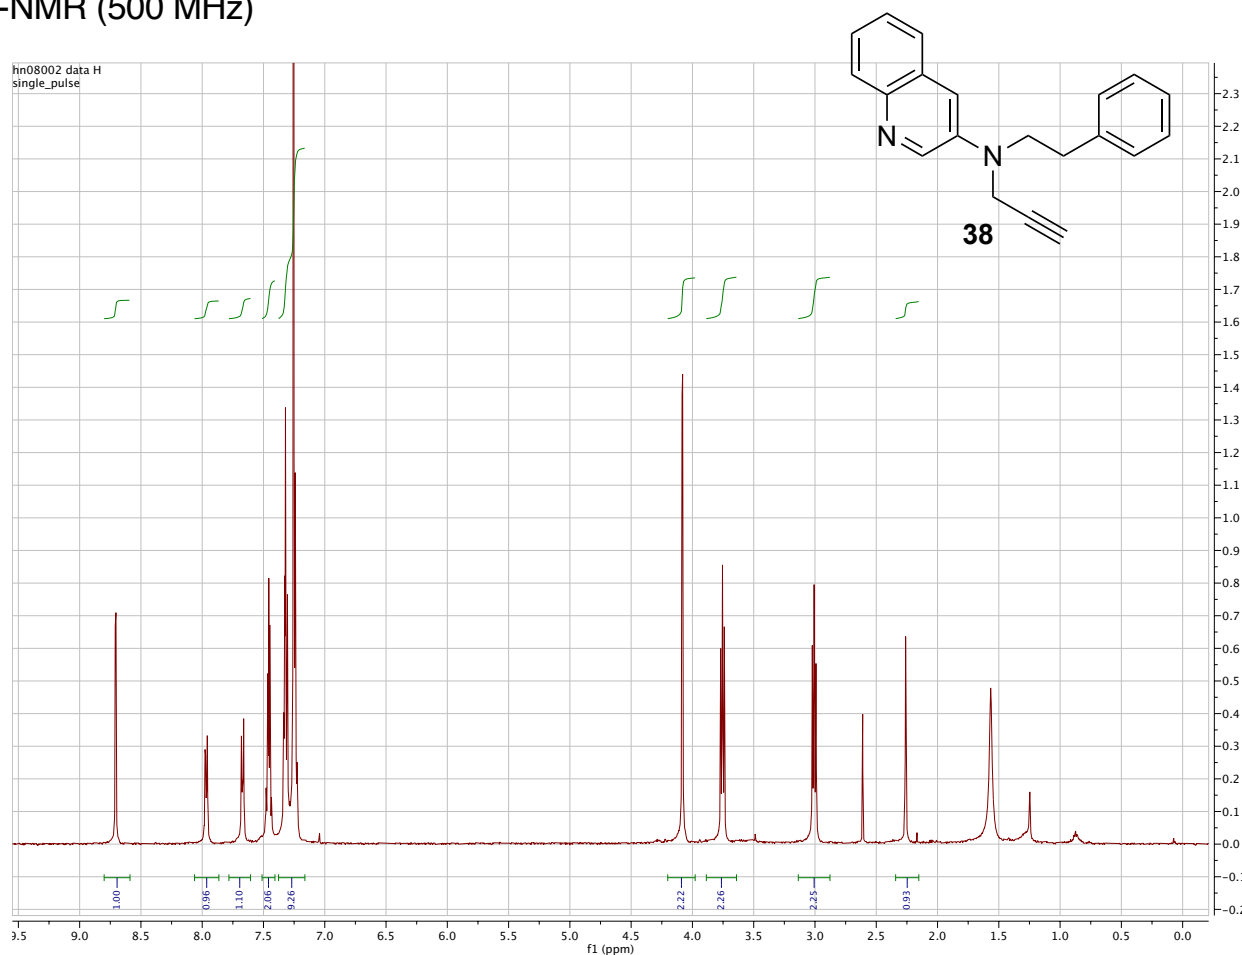

# <sup>13</sup>C-NMR (125 MHz)

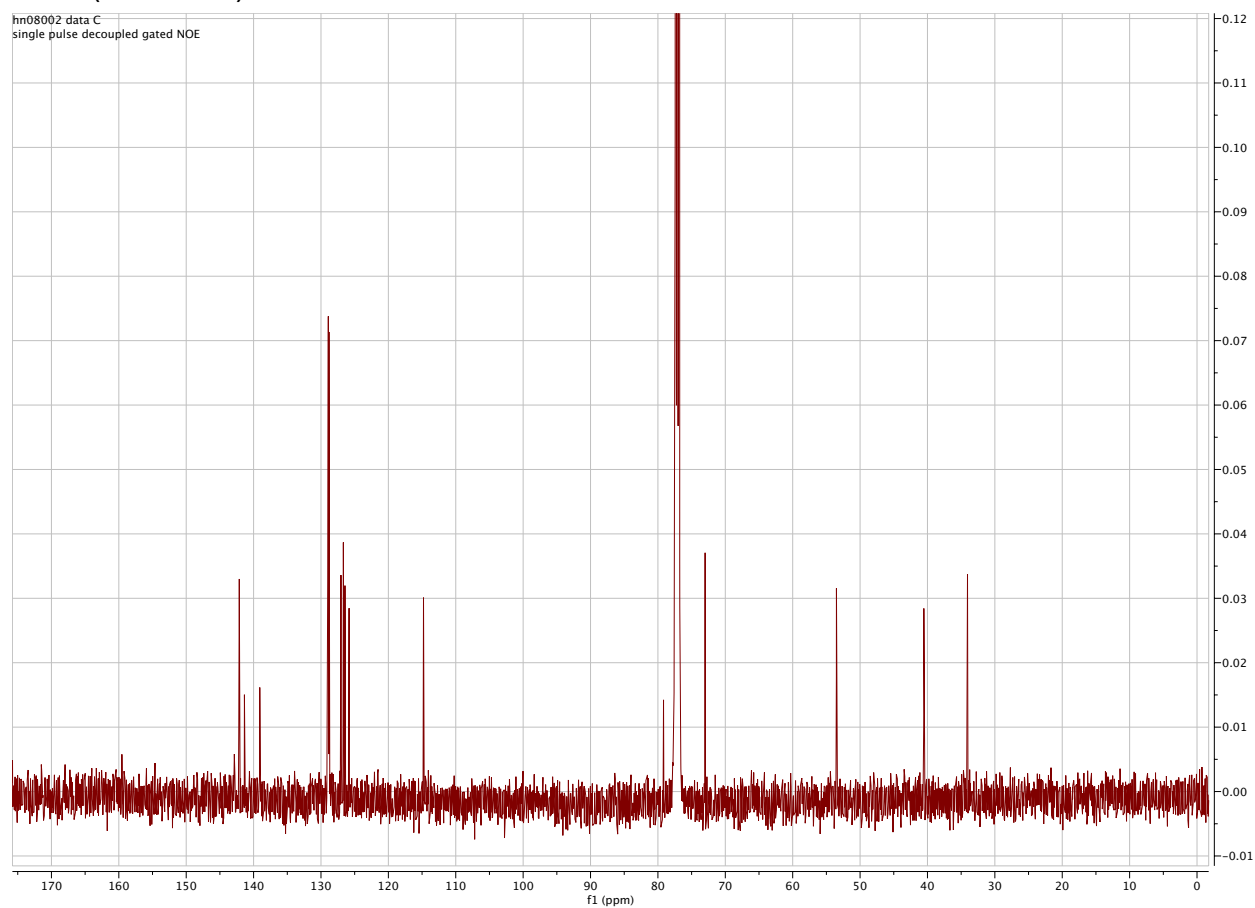

# <sup>1</sup>H-NMR (600 MHz)

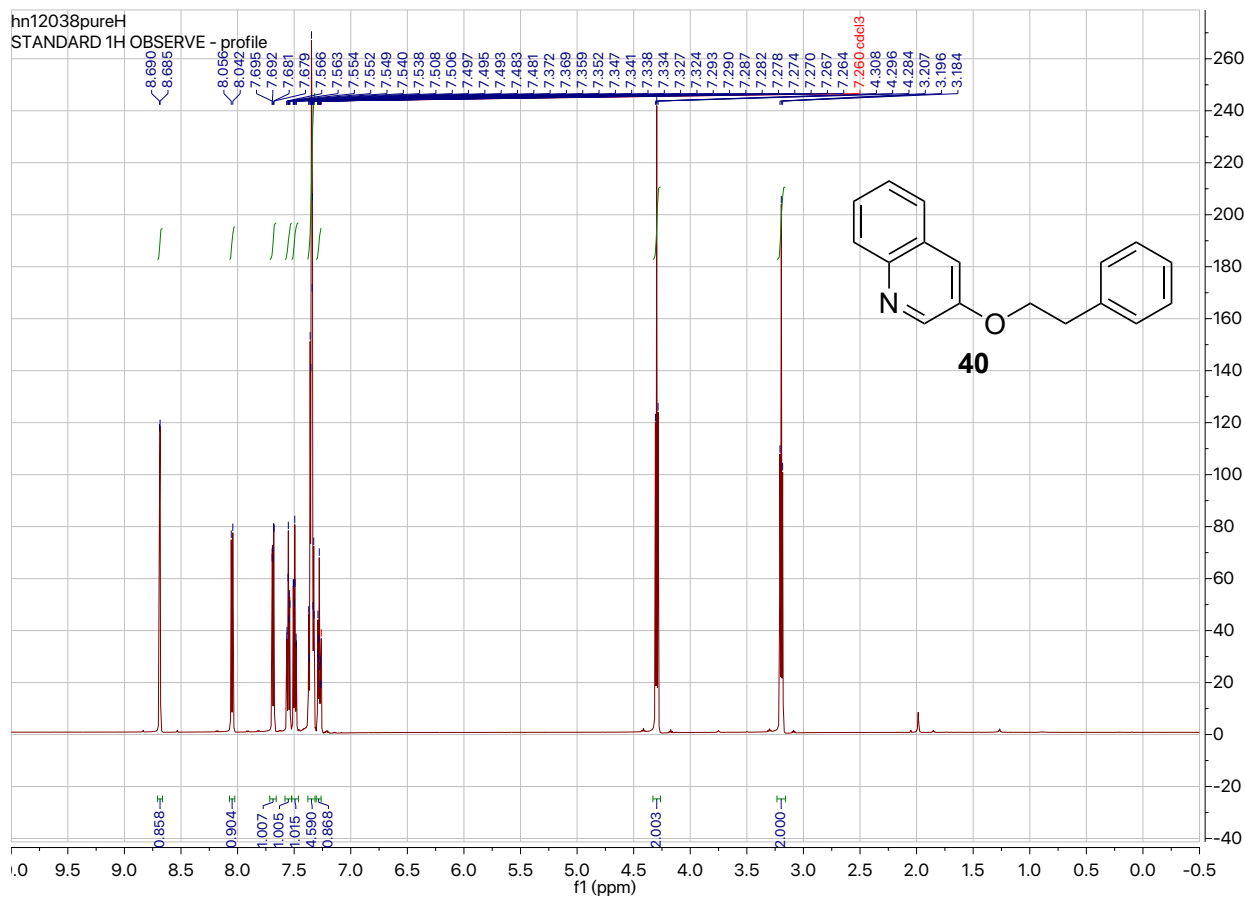

# <sup>13</sup>C-NMR (150 MHz)

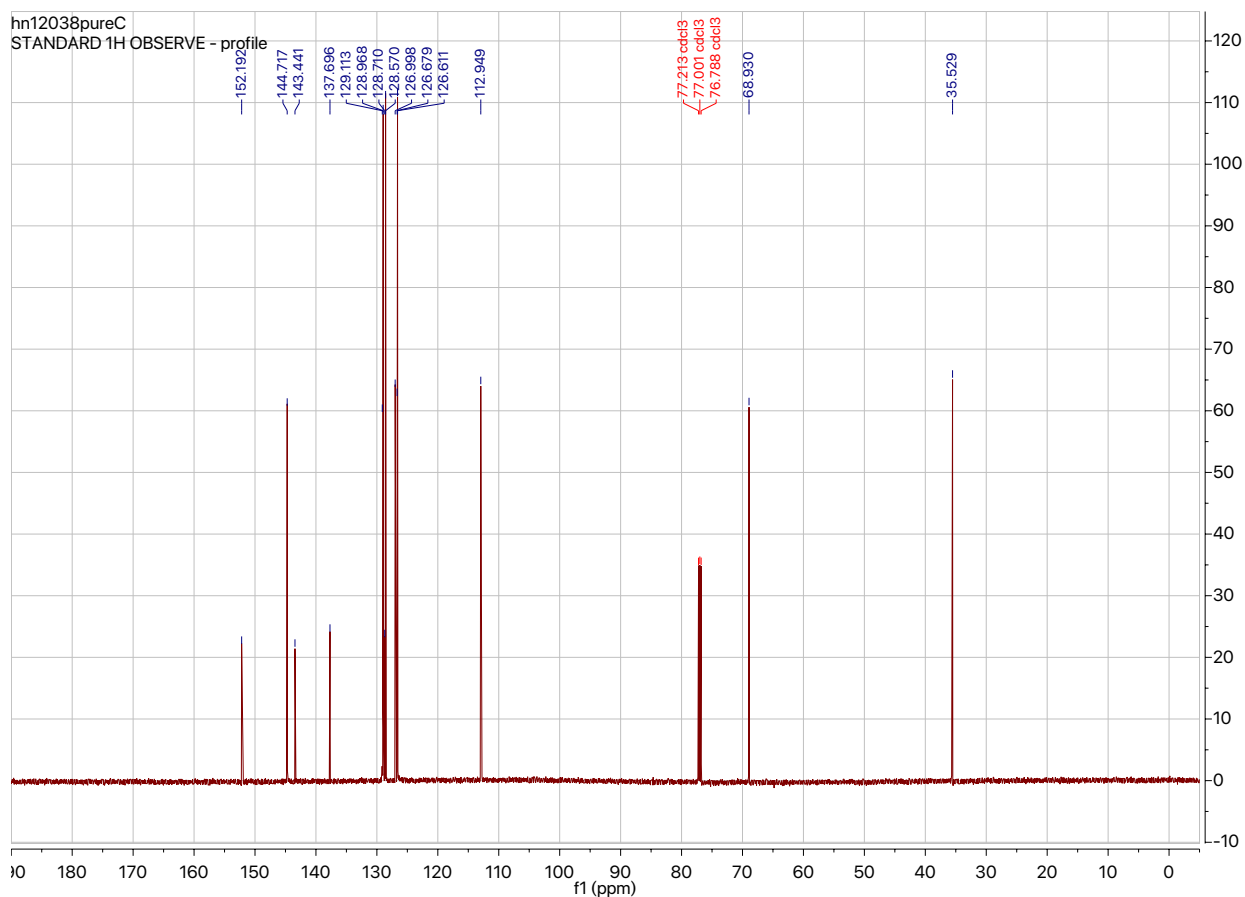



# <sup>1</sup>H-NMR (500 MHz)

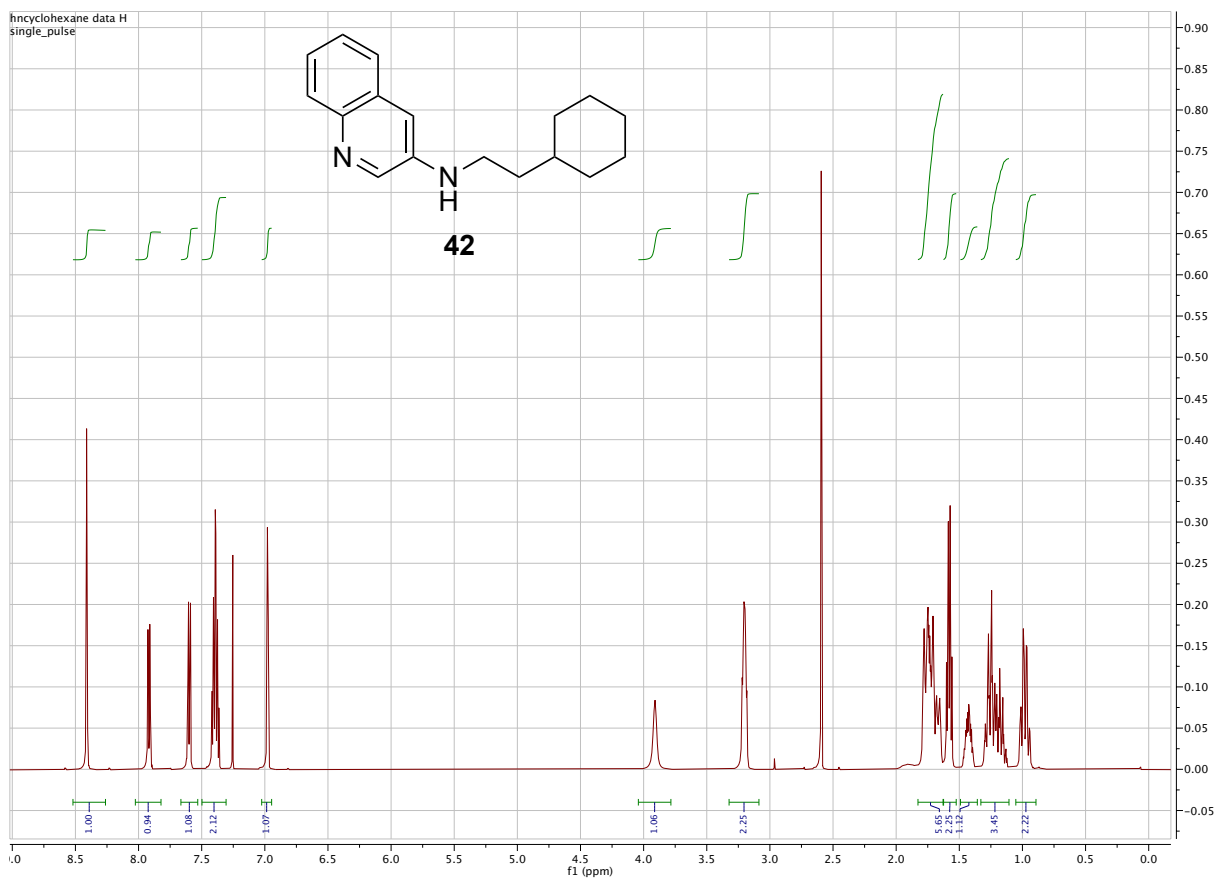

# <sup>13</sup>C-NMR (125 MHz)

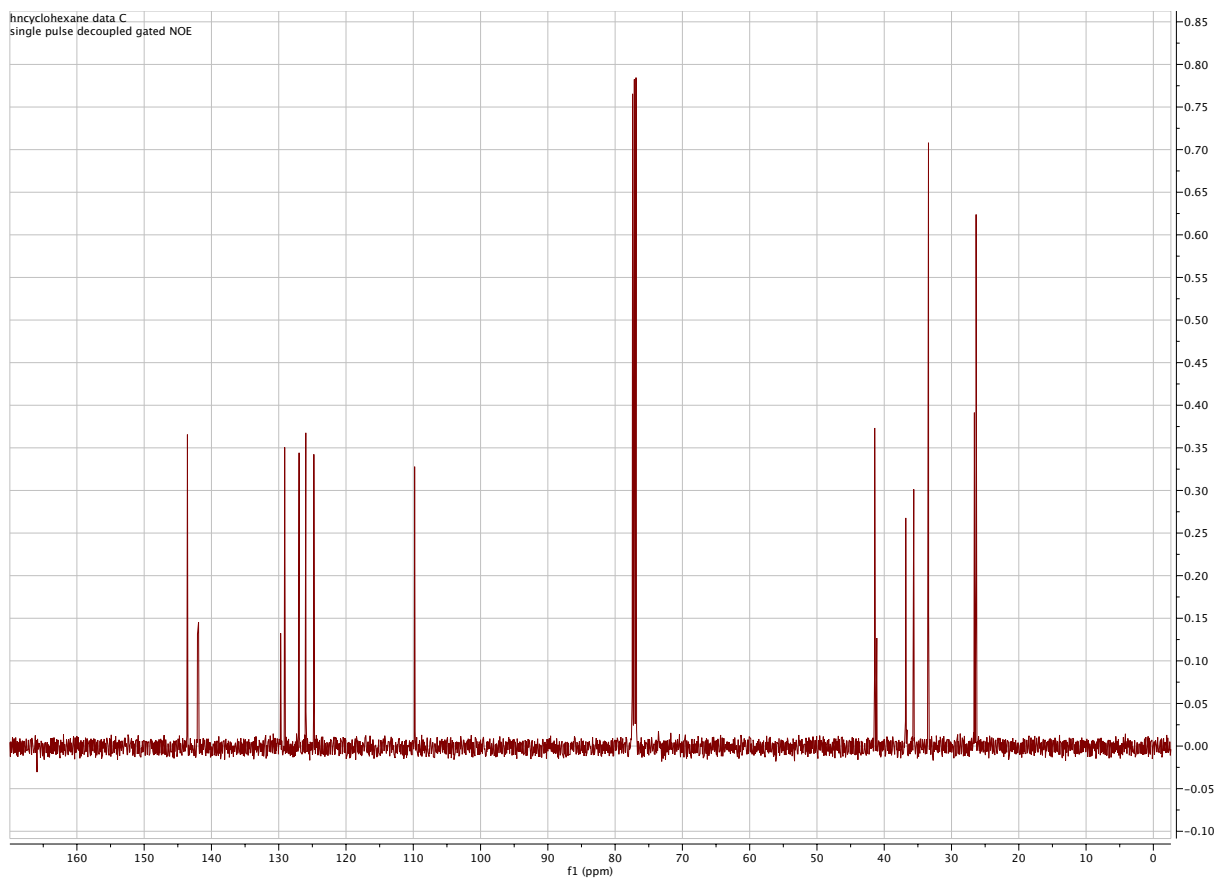

# <sup>1</sup>H-NMR (600 MHz)

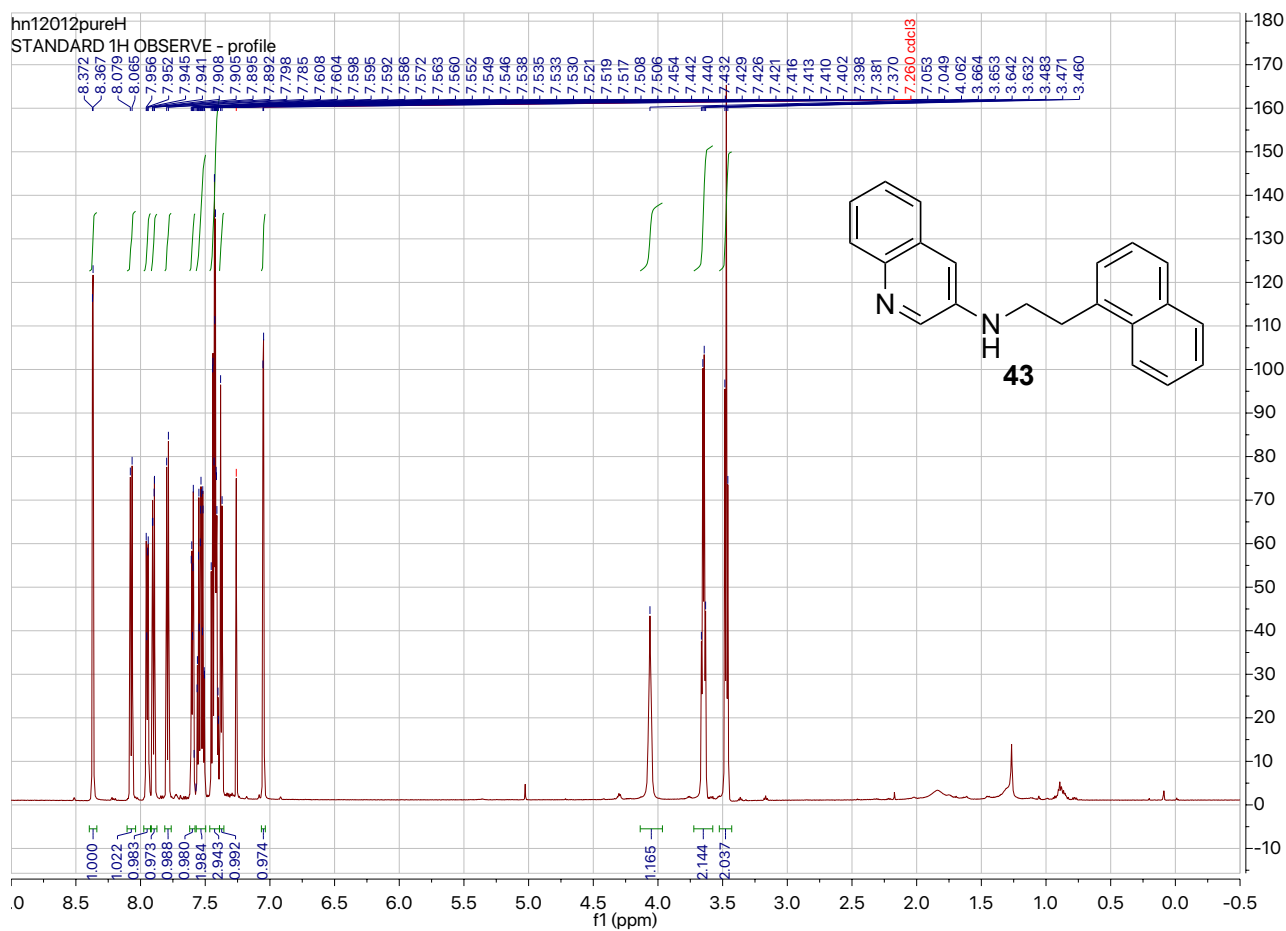

# <sup>13</sup>C-NMR (150 MHz)

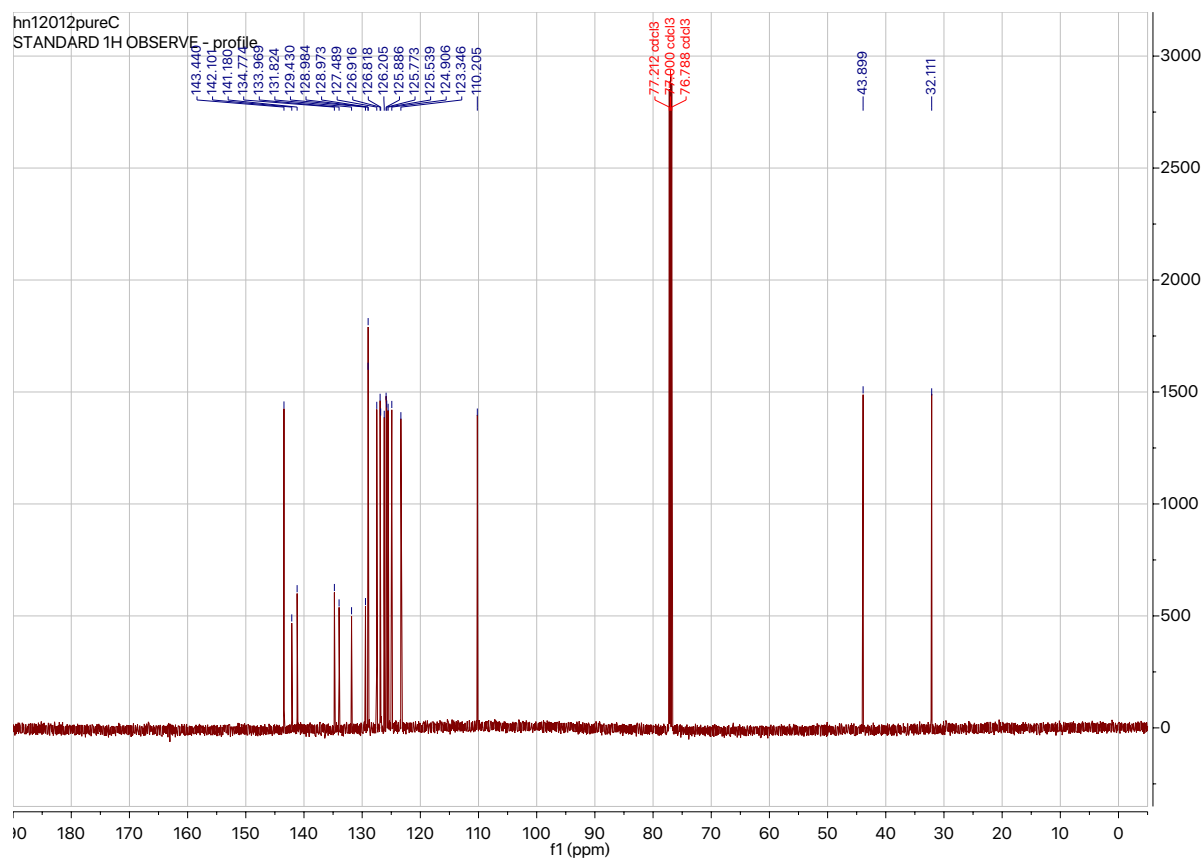

# <sup>1</sup>H-NMR (500 MHz)

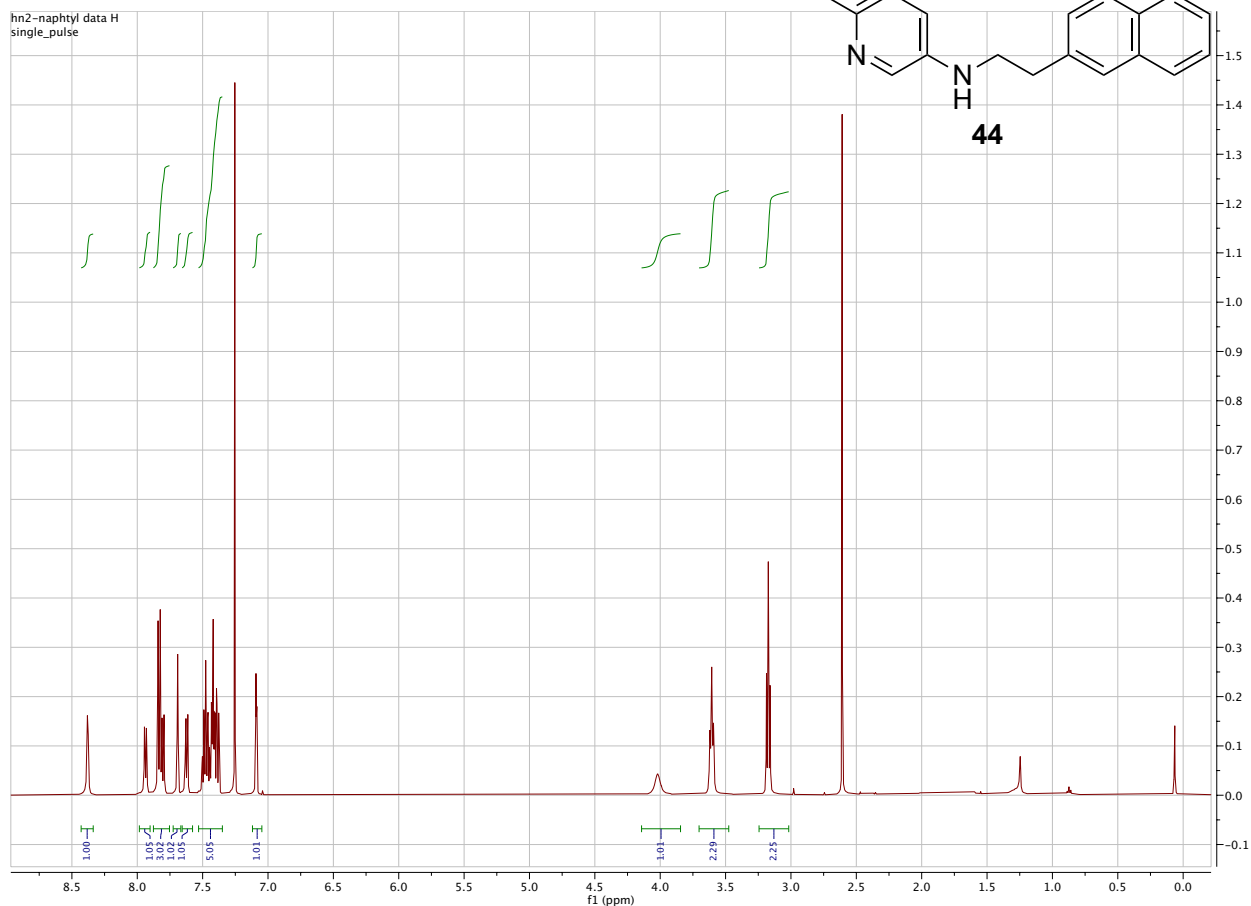

# <sup>13</sup>C-NMR (125 MHz)

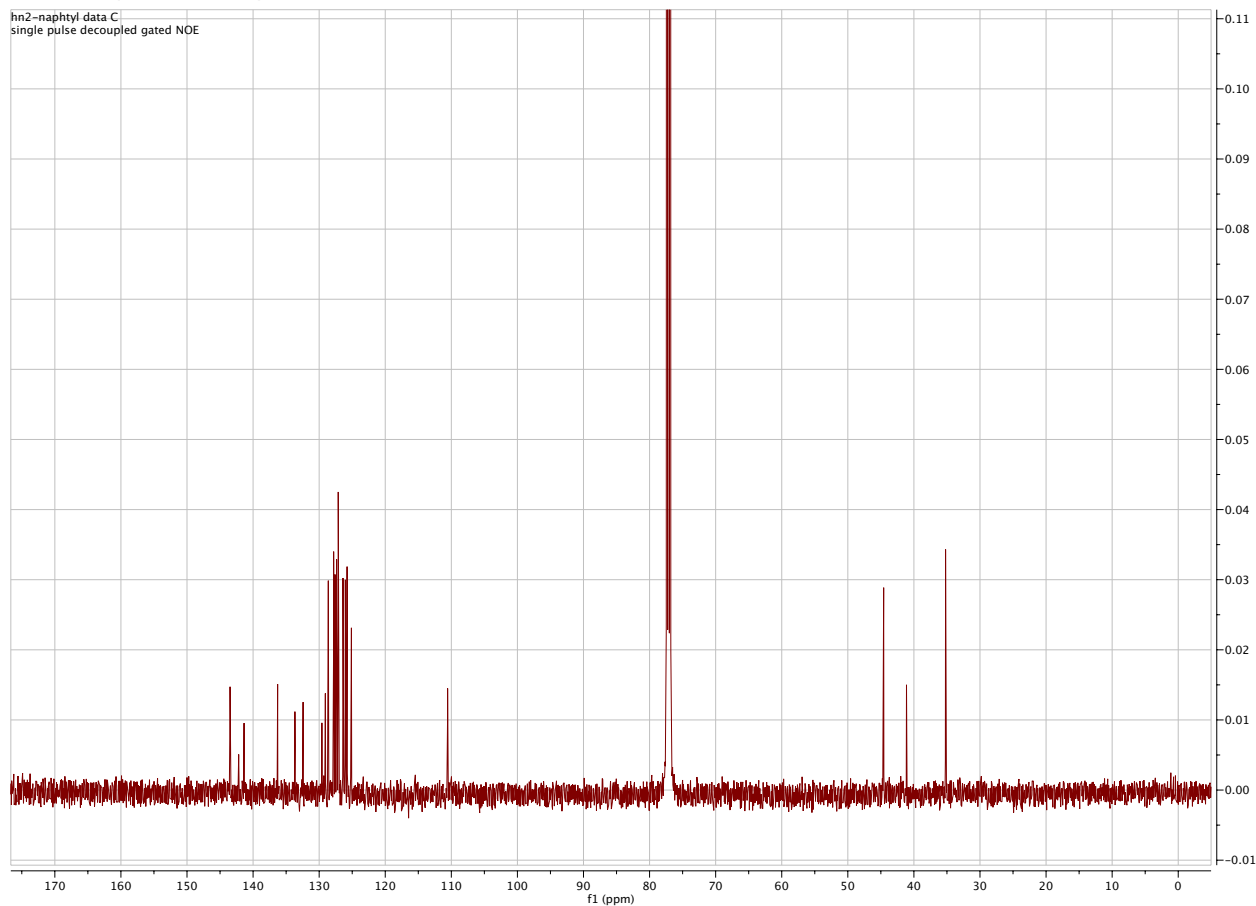

# <sup>1</sup>H-NMR (500 MHz)

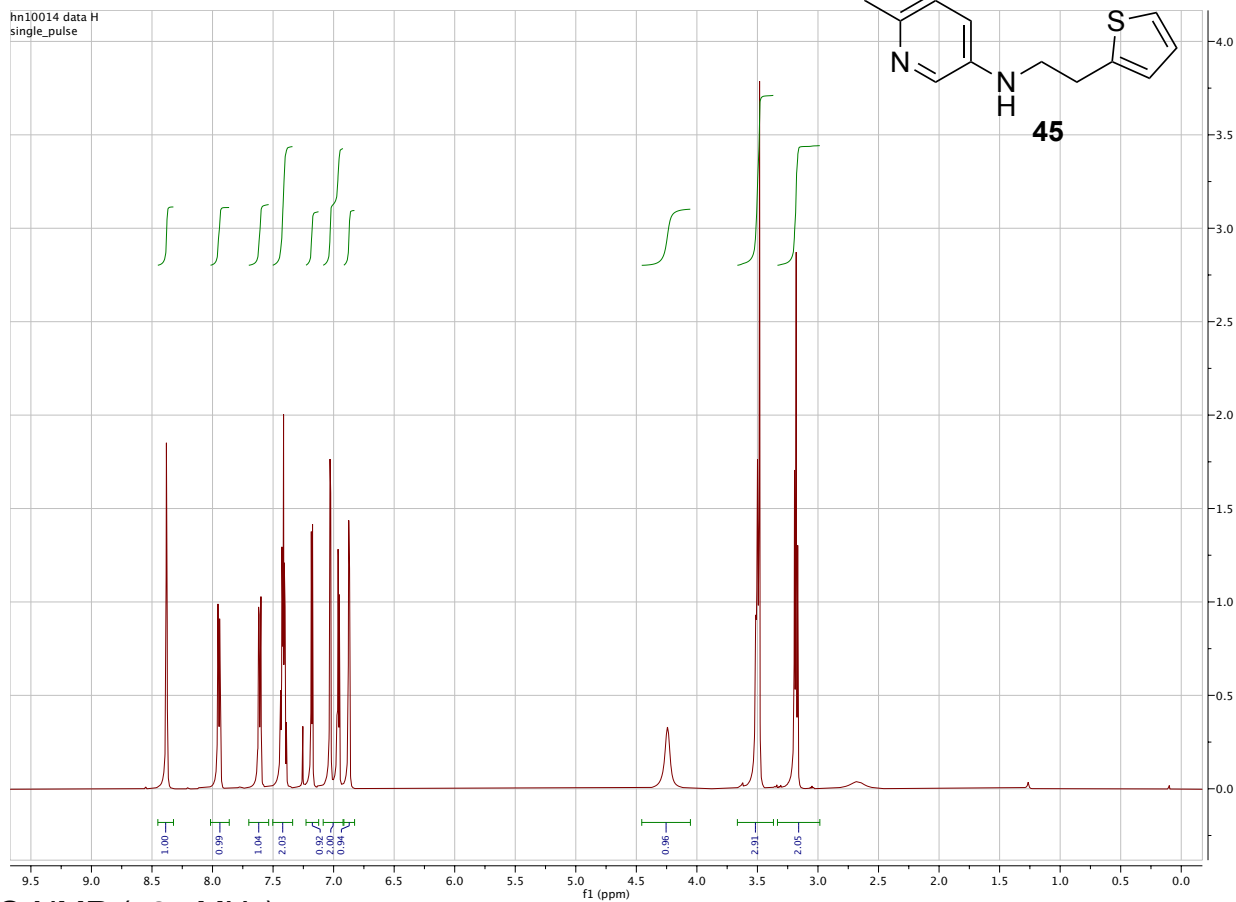

# <sup>13</sup>C-NMR (125 MHz)

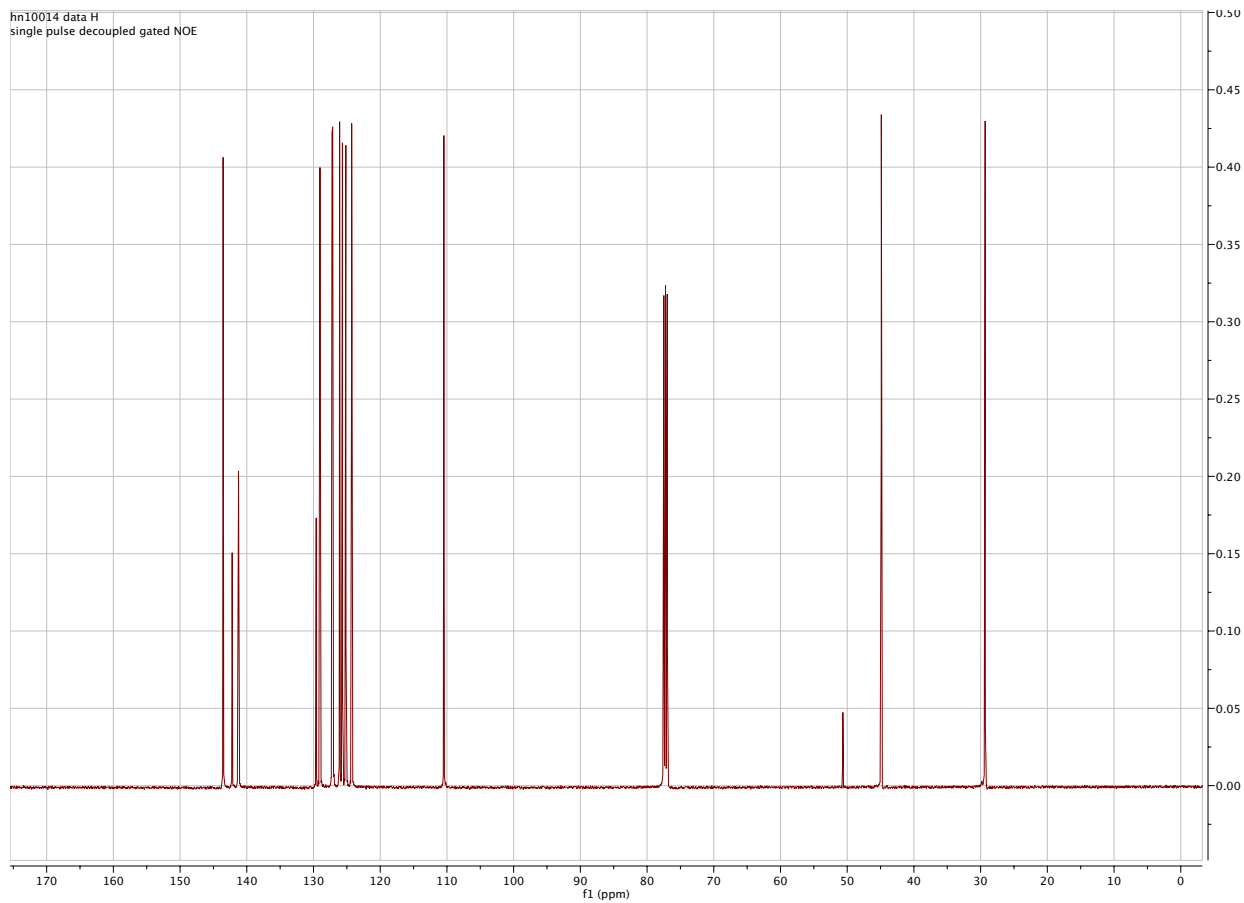

# <sup>1</sup>H-NMR (600 MHz)

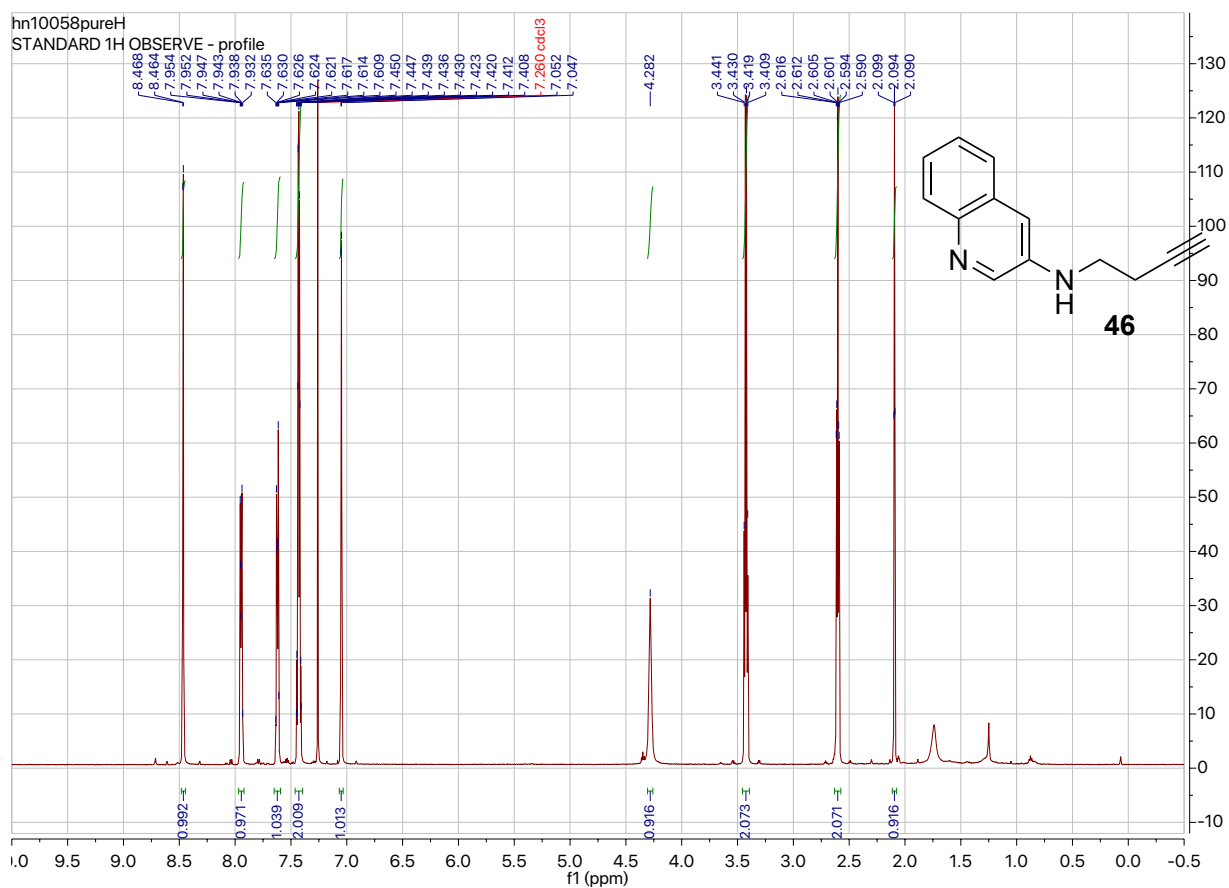

# <sup>13</sup>C-NMR (150 MHz)

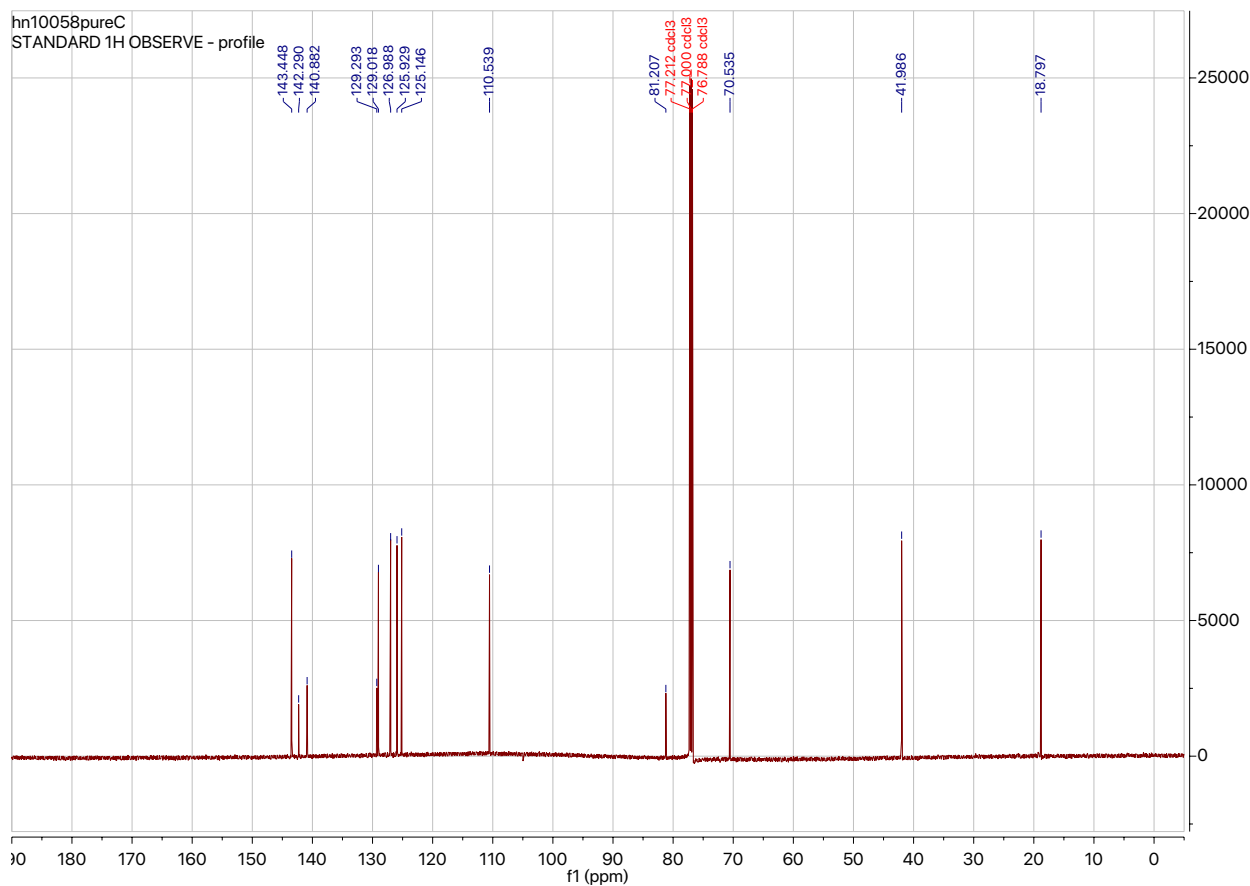

Supplement: s1 [file s1]
